# Supplementary material for: Family Size Evolution in Drosophila Chemosensory Gene Families: A Comparative Analysis with a Critical Appraisal of Methods
Source: Genome Biol Evol. 2014 Jun 19;6(7):1669–82. doi: 10.1093/gbe/evu130 (PMC4122928; doi:10.1093/gbe/evu130)

## Supplementary Figures

**Figure S1.** *Drosophila* tree showing the number of gene gains and losses per branch and per chemosensory family as estimated using GT-ST reconciliation. The right panel shows the number of genes per species and gene family.

**Figure S2.** Error in gene birth ( $\beta$ ) and death ( $\delta$ ) rate estimates over 500 simulations of experiment 1, as obtained with different computational methods (see text for details). Note that graphs have different scales.

**Figure S3.** Error in global birth ( $\beta$ ) and death ( $\delta$ ) rate estimates obtained with different methods (see text for details) across 10 simulated gene families obtained with the HyPhy library of R. In *GRlow* simulations  $\beta=\delta=0.002$  and in *GRhigh* simulations  $\beta=\delta=0.02$ .

**Figure S4.** Global birth ( $\beta$ ) and death ( $\delta$ ) rate estimates obtained with different methods (see text for details) across 10 simulated gene families obtained with the HyPhy library of R. In *GRlow* simulations  $\beta=\delta=0.002$  and in *GRhigh* simulations  $\beta=\delta=0.02$ . Red line marks the expected (simulated) values. See main text for details.

**Figure S5.** Error in gene birth ( $\beta$ ) and death ( $\delta$ ) rate estimates over the 500 simulations of experiment 2.1, as obtained with different computational methods (see text for details). Note that graphs have different scales.

**Figure S6.** Birth ( $\beta$ ) and death ( $\delta$ ) rate estimates for the foreground species across the simulated gene families of Exp 2.2 that showed significant rate heterogeneity among

lineages. Red lines mark the expected (simulated) value of the death rate and the blue lines mark the expected value of the birth rate. Outliers of the *BRlow* simulations were excluded from the graph. See main text and Table 1 for details.

**Figure S7.** Global birth ( $\beta$ ) and death ( $\delta$ ) rate estimates for the background species across the simulated gene families of Exp 2.2 that showed significant rate heterogeneity among lineages. Red line marks the expected (simulated) values. See main text and Table 1 for details.

Fig. S1

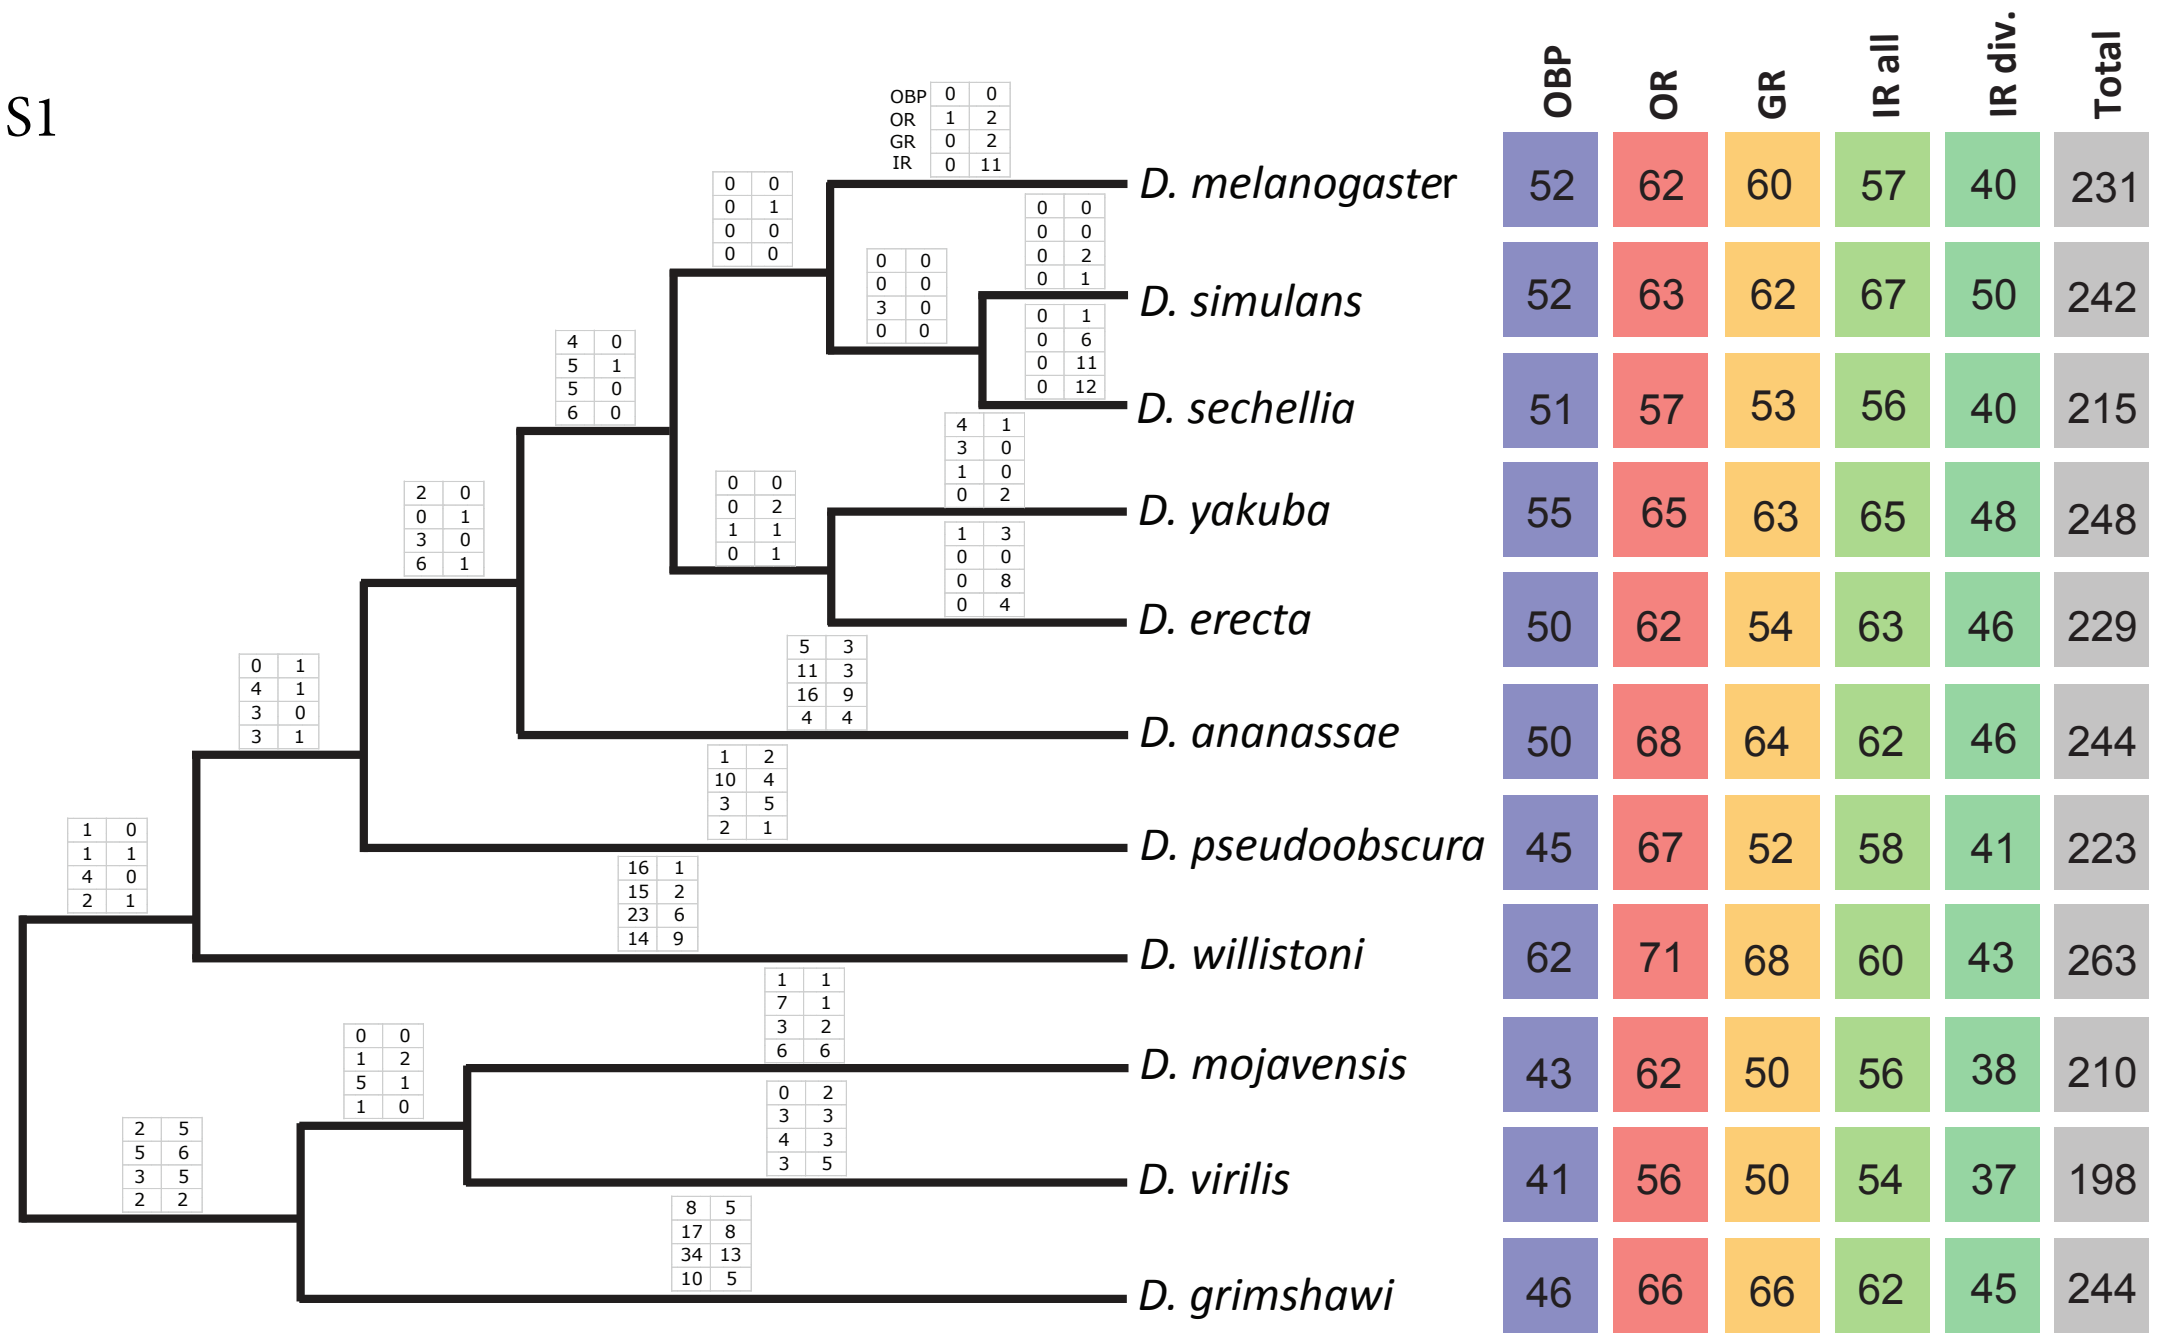

Fig. S2

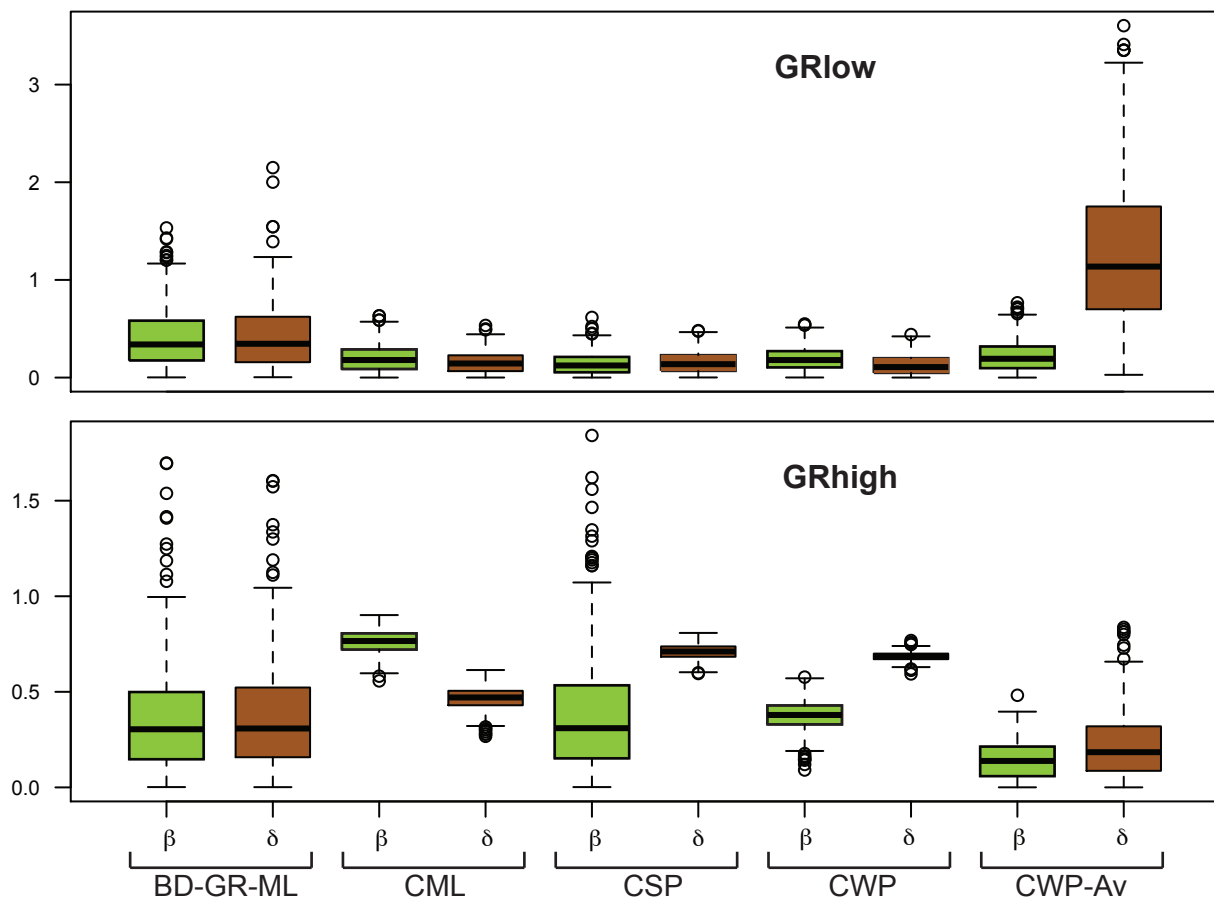

Fig. S3

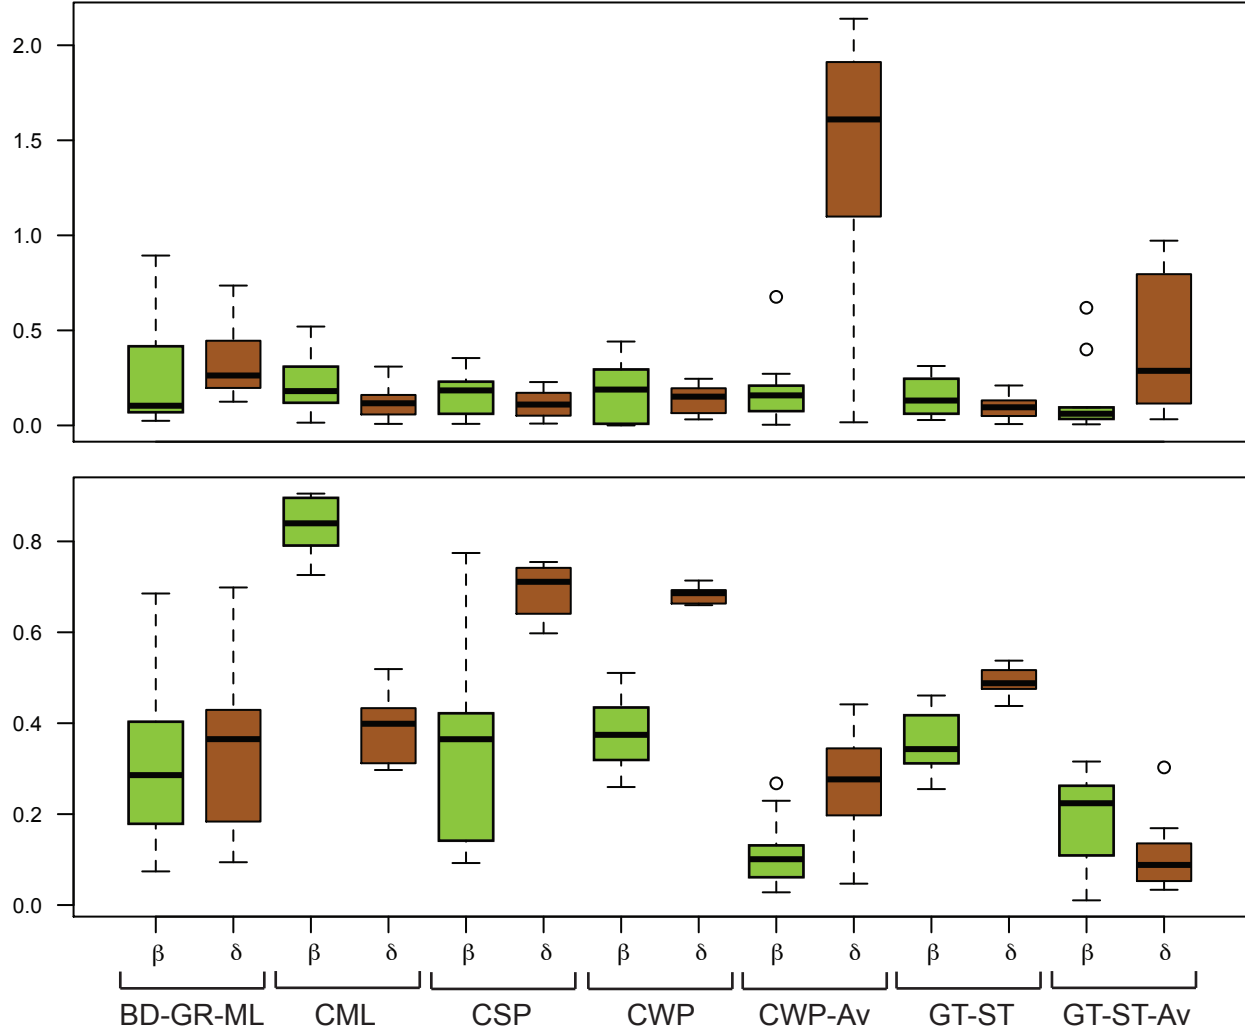

Fig. S4

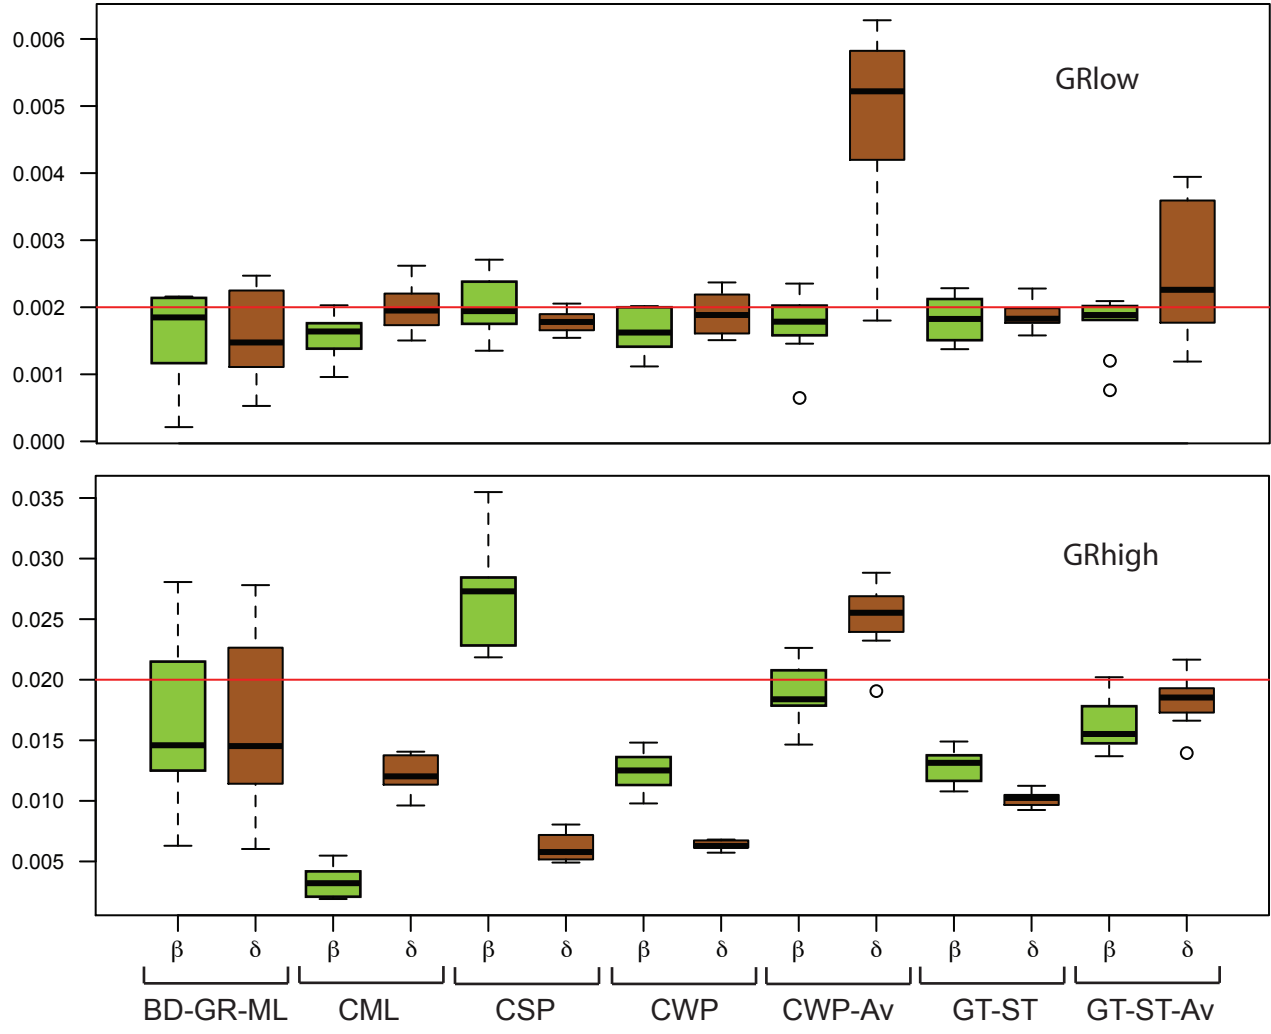

Fig. S5

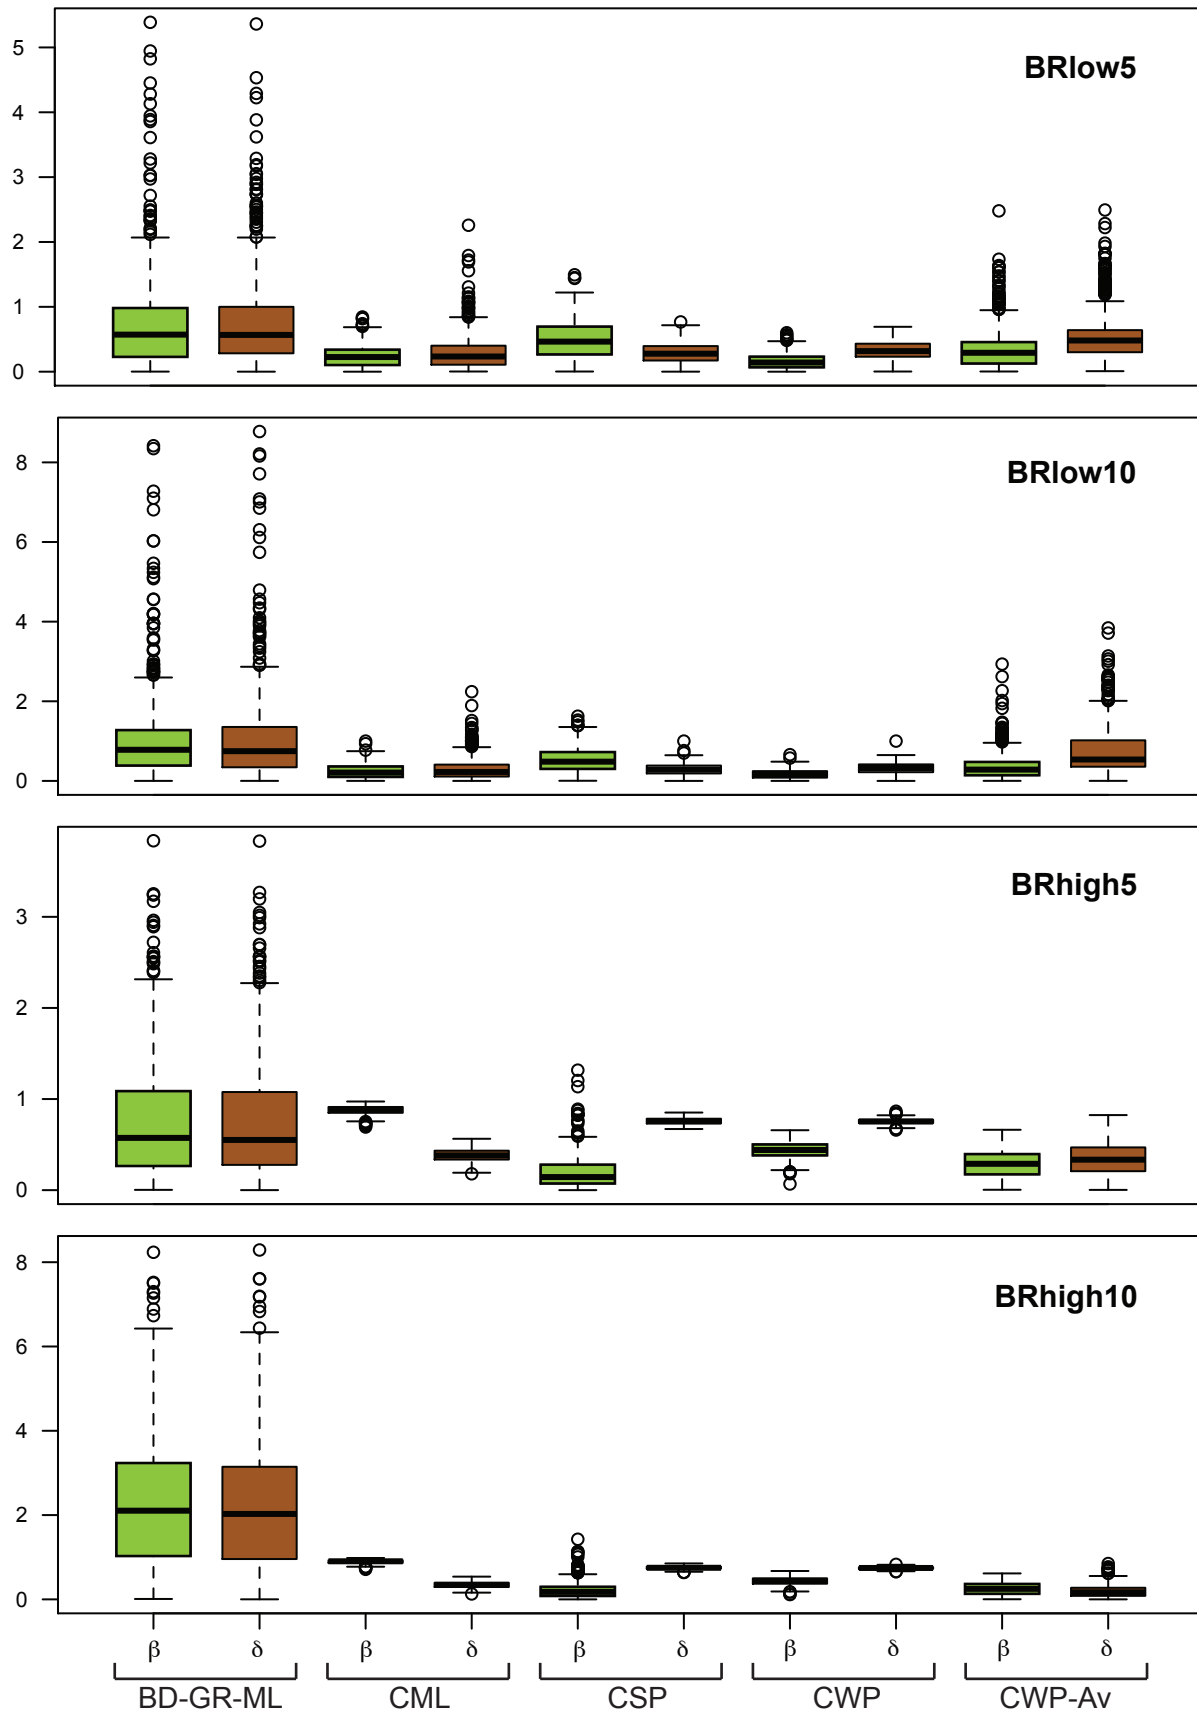

Fig. S6

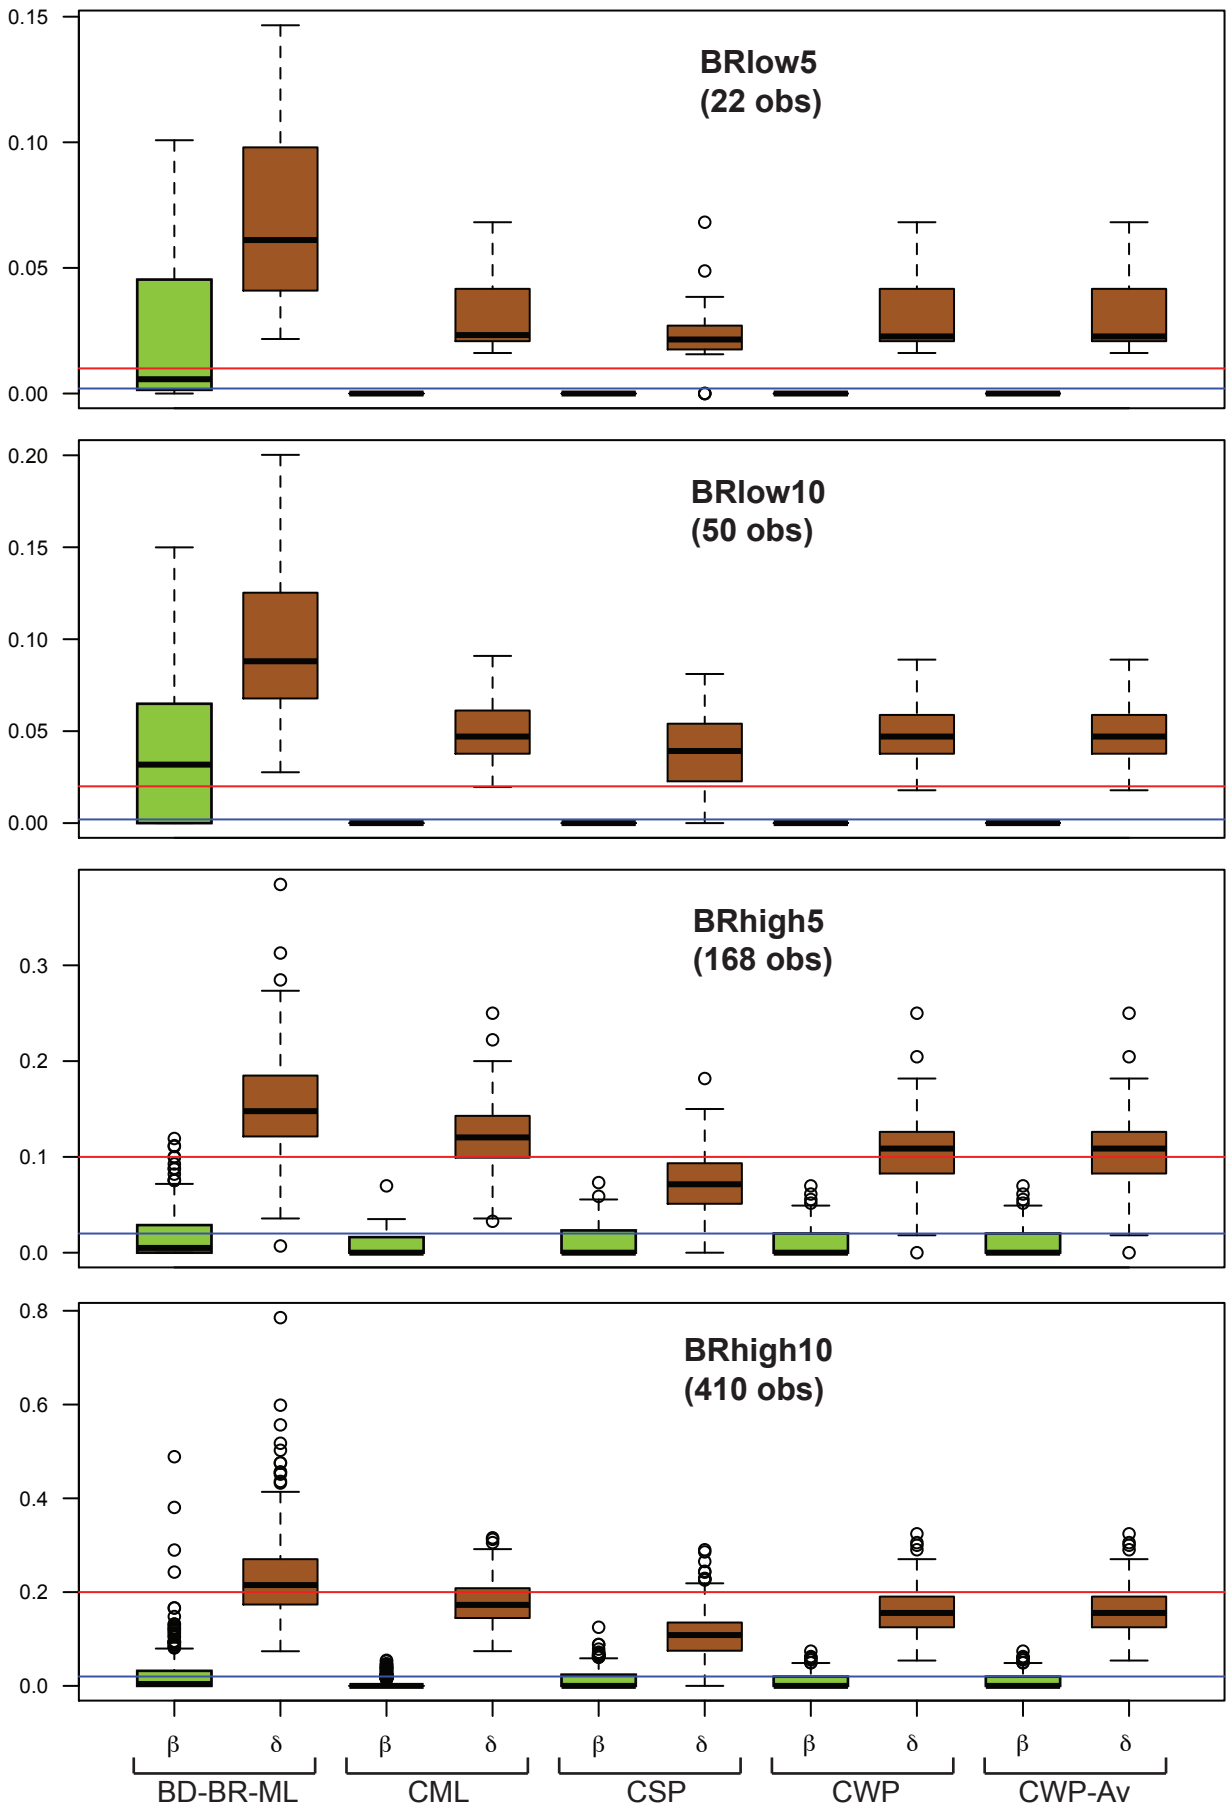

Fig. S7

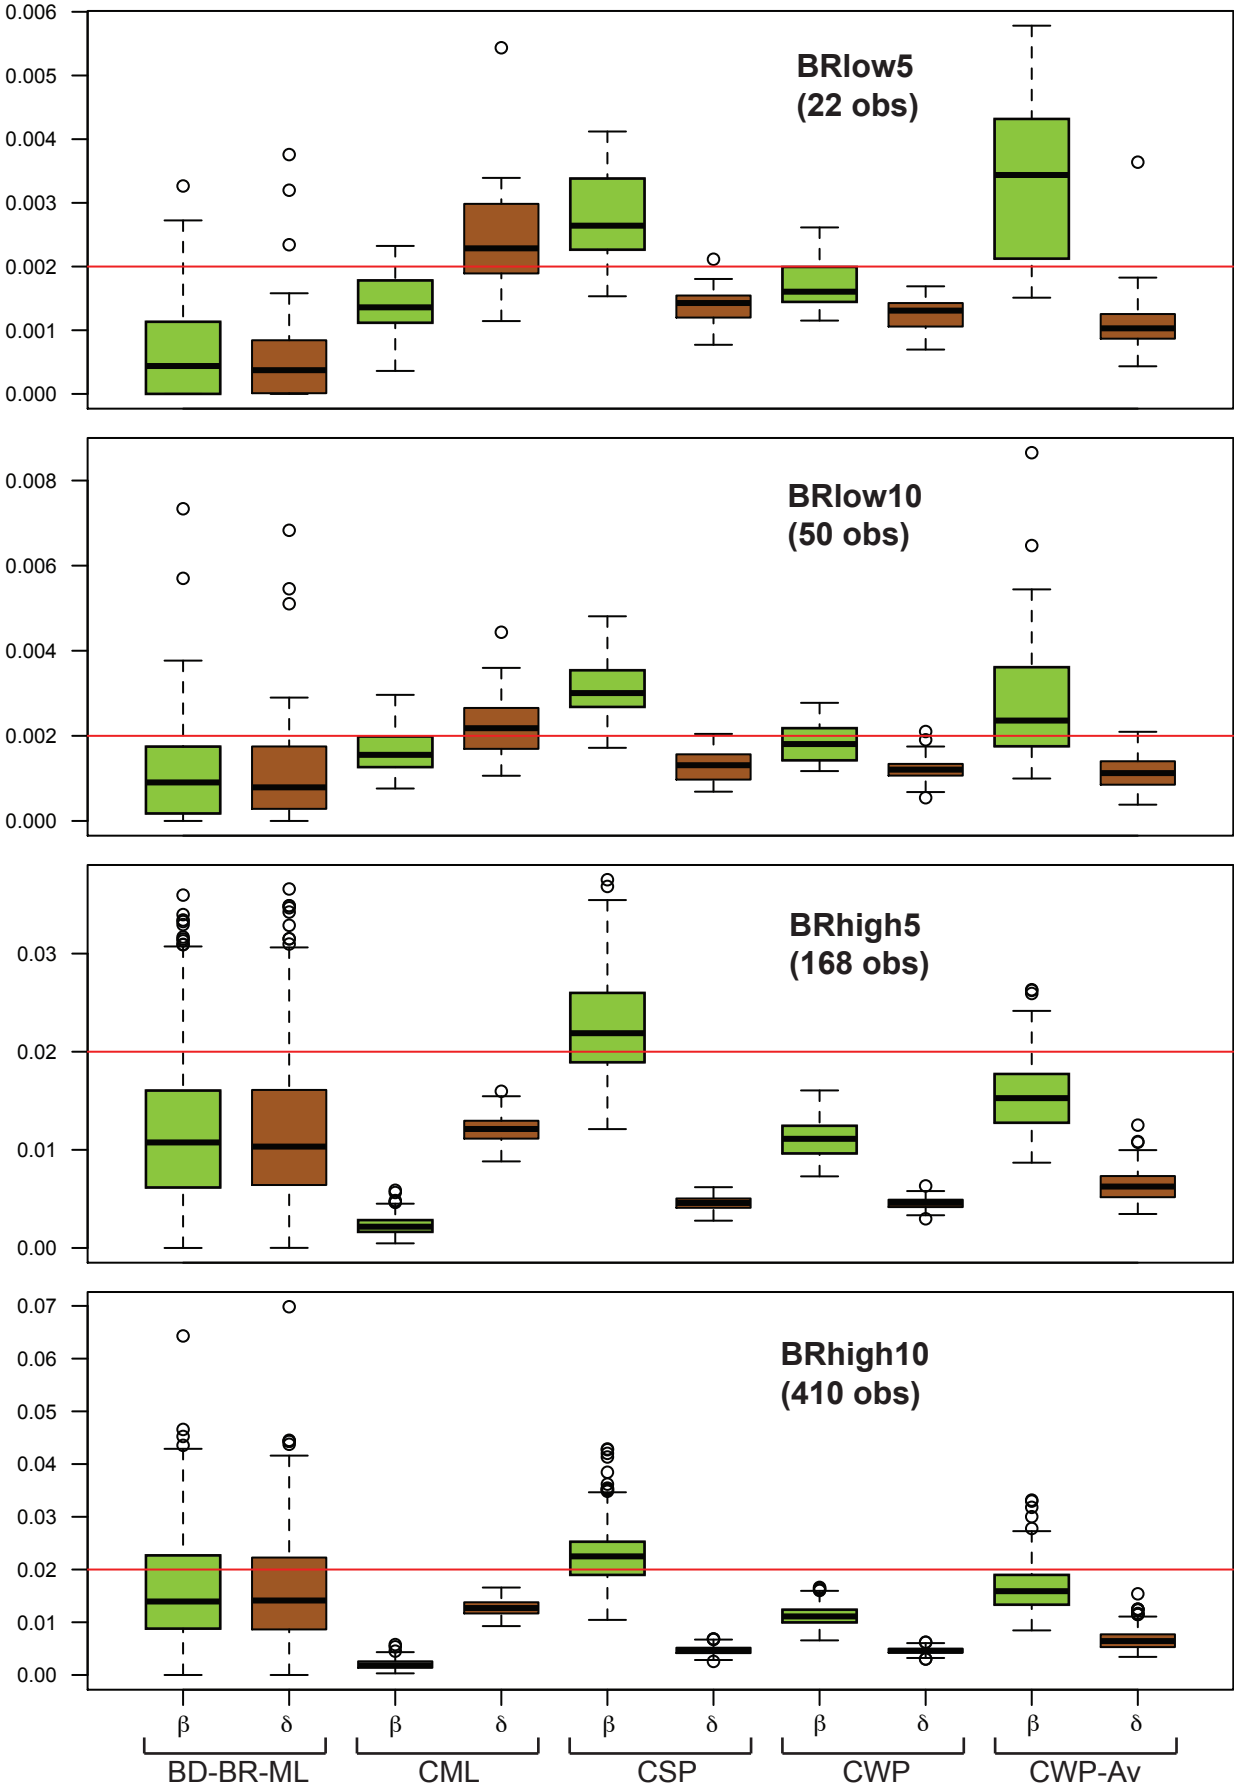

Supplement: Supplementary Data [file supp_evu130_Supplementary_Figures.pdf]
