# Supplementary material for: Family Size Evolution in Drosophila Chemosensory Gene Families: A Comparative Analysis with a Critical Appraisal of Methods
Source: PubMed Central journal article supplement (PMC4122928; doi:10.1093/gbe/evu130), 2014-06-19
Supplement: supp_evu130_evu130-Supplementary_Tables.pdf [file supp_evu130_evu130-Supplementary_Tables.pdf]

## Supplementary Tables

Table S1. OBP ortholog groups (OG), number of copies per species, total number of gains, losses, and events.

| OG        | dmel | dsim | dsec | dyak | dere | dana | dpse | dwil | dmoj | dvir | dgri | gains | losses | events |
|-----------|------|------|------|------|------|------|------|------|------|------|------|-------|--------|--------|
| Obp08a    | 1    | 1    | 1    | 1    | 1    | 0    | 1    | 1    | 1    | 1    | 0    | 0     | 2      | 2      |
| Obp18a    | 1    | 1    | 0    | 1    | 0    | 1    | 0    | 7    | 1    | 0    | 1    | 6     | 4      | 10     |
| Obp19a    | 1    | 1    | 1    | 1    | 1    | 1    | 1    | 1    | 1    | 1    | 1    | 0     | 0      | 0      |
| Obp19b    | 1    | 1    | 1    | 1    | 1    | 1    | 1    | 1    | 1    | 1    | 1    | 0     | 0      | 0      |
| Obp19c    | 1    | 1    | 1    | 1    | 1    | 1    | 1    | 1    | 1    | 1    | 1    | 0     | 0      | 0      |
| Obp19d    | 1    | 1    | 1    | 1    | 1    | 1    | 1    | 1    | 1    | 1    | 1    | 0     | 0      | 0      |
| Obp22a    | 1    | 1    | 1    | 1    | 2    | 0    | 0    | 0    | 0    | 0    | 0    | 1     | -      | 1      |
| Obp28a    | 1    | 1    | 1    | 1    | 1    | 1    | 1    | 1    | 1    | 1    | 1    | 0     | 0      | 0      |
| Obp44a    | 1    | 1    | 1    | 1    | 1    | 1    | 1    | 1    | 1    | 1    | 1    | 0     | 0      | 0      |
| Obp46a    | 1    | 1    | 1    | 1    | 1    | 1    | 1    | 1    | 1    | 1    | 1    | 0     | 0      | 0      |
| Obp47a    | 1    | 1    | 1    | 1    | 1    | 1    | 1    | 1    | 1    | 0    | 0    | 0     | 2      | 2      |
| Obp47b    | 1    | 1    | 1    | 1    | 1    | 1    | 1    | 1    | 1    | 1    | 1    | 0     | 0      | 0      |
| Obp49a    | 1    | 1    | 1    | 1    | 1    | 1    | 1    | 1    | 1    | 1    | 1    | 0     | 0      | 0      |
| Obp50a    | 1    | 1    | 1    | 1    | 1    | 1    | 1    | 1    | 1    | 1    | 1    | 0     | 0      | 0      |
| Obp50b    | 1    | 1    | 1    | 1    | 1    | 1    | 1    | 1    | 0    | 0    | 0    | 0     | 1      | 1      |
| Obp50c    | 1    | 1    | 1    | 1    | 1    | 1    | 1    | 3    | 1    | 1    | 1    | 2     | 0      | 2      |
| Obp50d    | 1    | 1    | 1    | 1    | 1    | 1    | 1    | 2    | 0    | 0    | 0    | 1     | 1      | 2      |
| Obp50e    | 1    | 1    | 1    | 1    | 1    | 1    | 1    | 1    | 1    | 1    | 1    | 0     | 0      | 0      |
| Obp51a    | 1    | 1    | 1    | 2    | 0    | 0    | 0    | 0    | 0    | 0    | 0    | 1     | -      | 1      |
| Obp56a    | 1    | 1    | 1    | 1    | 1    | 1    | 1    | 1    | 1    | 1    | 2    | 1     | 0      | 1      |
| Obp56b    | 1    | 1    | 1    | 1    | 1    | 1    | 1    | 1    | 1    | 1    | 1    | 0     | 0      | 0      |
| Obp56c    | 1    | 1    | 1    | 1    | 1    | 1    | 1    | 1    | 1    | 1    | 1    | 0     | 0      | 0      |
| Obp56de   | 2    | 2    | 2    | 2    | 2    | 2    | 2    | 2    | 3    | 2    | 2    | 3     | 0      | 3      |
| Obp56f    | 1    | 1    | 1    | 1    | 1    | 3    | 0    | 0    | 0    | 0    | 0    | 2     | -      | 2      |
| Obp56g    | 1    | 1    | 1    | 1    | 1    | 1    | 2    | 5    | 1    | 1    | 1    | 5     | 0      | 5      |
| Obp56h    | 1    | 1    | 1    | 1    | 1    | 1    | 1    | 1    | 1    | 1    | 1    | 0     | 0      | 0      |
| Obp56i    | 1    | 1    | 1    | 1    | 1    | 0    | 0    | 0    | 0    | 0    | 0    | 0     | -      | 0      |
| Obp57ab   | 2    | 2    | 2    | 2    | 2    | 1    | 0    | 1    | 0    | 0    | 0    | 1     | 2      | 3      |
| Obp57c    | 1    | 1    | 1    | 1    | 1    | 2    | 1    | 3    | 2    | 2    | 2    | 4     | 0      | 4      |
| Obp57de   | 2    | 2    | 2    | 2    | 2    | 1    | 1    | 1    | 0    | 0    | 0    | 1     | 2      | 3      |
| Obp58b    | 1    | 1    | 1    | 1    | 1    | 1    | 1    | 1    | 1    | 1    | 3    | 2     | 0      | 2      |
| Obp58c    | 1    | 1    | 1    | 1    | 1    | 1    | 1    | 1    | 1    | 1    | 3    | 2     | 0      | 2      |
| Obp58d    | 1    | 1    | 1    | 1    | 1    | 1    | 1    | 1    | 1    | 1    | 1    | 0     | 0      | 0      |
| Obp59a    | 1    | 1    | 1    | 1    | 1    | 0    | 1    | 1    | 1    | 1    | 1    | 0     | 1      | 1      |
| Obp69a    | 1    | 1    | 1    | 1    | 1    | 1    | 1    | 1    | 1    | 1    | 1    | 0     | 0      | 0      |
| Obp73a    | 1    | 1    | 1    | 1    | 1    | 1    | 1    | 1    | 1    | 1    | 1    | 0     | 0      | 0      |
| Obp76a    | 1    | 1    | 1    | 2    | 1    | 1    | 1    | 1    | 1    | 1    | 1    | 1     | 0      | 1      |
| Obp83a    | 1    | 1    | 1    | 1    | 1    | 1    | 1    | 1    | 1    | 1    | 1    | 0     | 0      | 0      |
| Obp83abL1 | 0    | 0    | 0    | 0    | 0    | 0    | 0    | 1    | 1    | 1    | 1    | 0     | 1      | 1      |
| Obp83b    | 1    | 1    | 1    | 1    | 1    | 1    | 1    | 1    | 0    | 0    | 0    | 0     | 1      | 1      |
| Obp83cd   | 1    | 1    | 1    | 1    | 1    | 1    | 1    | 1    | 0    | 1    | 1    | 0     | 1      | 1      |
| Obp83ef   | 1    | 1    | 1    | 1    | 1    | 1    | 1    | 1    | 1    | 1    | 1    | 0     | 0      | 0      |
| Obp83g    | 1    | 1    | 1    | 1    | 1    | 1    | 1    | 1    | 1    | 1    | 1    | 0     | 0      | 0      |
| Obp84a    | 1    | 1    | 1    | 1    | 1    | 1    | 1    | 1    | 1    | 1    | 1    | 0     | 0      | 0      |
| Obp85a    | 1    | 1    | 1    | 1    | 1    | 1    | 1    | 1    | 1    | 1    | 1    | 0     | 0      | 0      |
| Obp93a    | 1    | 1    | 1    | 2    | 1    | 1    | 1    | 1    | 1    | 1    | 1    | 1     | 0      | 1      |
| Obp99a    | 1    | 1    | 1    | 1    | 1    | 1    | 1    | 1    | 1    | 1    | 1    | 0     | 0      | 0      |
| Obp99b    | 1    | 1    | 1    | 1    | 0    | 3    | 1    | 1    | 1    | 1    | 1    | 2     | 1      | 3      |
| Obp99c    | 1    | 1    | 1    | 1    | 1    | 1    | 1    | 1    | 1    | 1    | 1    | 0     | 0      | 0      |
| Obp99d    | 1    | 1    | 1    | 1    | 1    | 1    | 1    | 1    | 1    | 1    | 1    | 0     | 0      | 0      |
| Total     | 52   | 52   | 51   | 55   | 50   | 50   | 45   | 62   | 43   | 41   | 46   | 36    | 19     | 55     |

Table S2. OR ortholog groups (OG), number of copies per species, total number of gains, losses, and events.

| OG       | dmel | dsim | dsec | dyak | dere | dana | dpse | dper | dwil | dmoj | dvir | dgri | dups | losses | events |
|----------|------|------|------|------|------|------|------|------|------|------|------|------|------|--------|--------|
| Or01a    | 1    | 1    | 1    | 1    | 1    | 1    | 1    | 1    | 1    | 1    | 1    | 0    | 0    | 1      | 1      |
| Or02a    | 1    | 1    | 1    | 1    | 1    | 1    | 1    | 1    | 1    | 1    | 1    | 0    | 0    | 1      | 1      |
| Or07a    | 1    | 1    | 1    | 1    | 1    | 1    | 0    | 0    | 1    | 0    | 0    | 0    | 0    | 2      | 2      |
| Or09a    | 1    | 1    | 1    | 1    | 1    | 1    | 1    | 1    | 1    | 1    | 1    | 1    | 0    | 0      | 0      |
| Or10a    | 1    | 1    | 1    | 1    | 1    | 1    | 1    | 1    | 1    | 1    | 1    | 1    | 0    | 0      | 0      |
| Or13a    | 1    | 1    | 0    | 1    | 1    | 1    | 1    | 1    | 1    | 1    | 0    | 1    | 0    | 2      | 2      |
| Or19a19b | 2    | 1    | 1    | 1    | 1    | 1    | 1    | 1    | 1    | 1    | 1    | 1    | 1    | 0      | 1      |
| Or22a    | 2    | 2    | 1    | 1    | 1    | 5    | 2    | 2    | 1    | 1    | 1    | 2    | 6    | 2      | 8      |
| Or22c    | 1    | 1    | 1    | 1    | 1    | 1    | 1    | 1    | 1    | 1    | 1    | 2    | 1    | 0      | 1      |
| Or23a    | 1    | 1    | 1    | 1    | 1    | 1    | 1    | 1    | 1    | 2    | 1    | 1    | 1    | 0      | 1      |
| Or24a    | 1    | 1    | 1    | 1    | 1    | 1    | 1    | 1    | 1    | 1    | 1    | 1    | 0    | 0      | 0      |
| Or30a    | 1    | 1    | 1    | 1    | 1    | 1    | 1    | 1    | 1    | 1    | 1    | 1    | 0    | 0      | 0      |
| Or33a    | 2    | 2    | 2    | 2    | 2    | 5    | 3    | 3    | 1    | 0    | 0    | 0    | 5    | 1      | 6      |
| Or33c    | 1    | 1    | 1    | 1    | 1    | 1    | 1    | 1    | 1    | 1    | 1    | 1    | 0    | 0      | 0      |
| Or35a    | 1    | 1    | 1    | 1    | 1    | 1    | 1    | 1    | 1    | 1    | 1    | 1    | 0    | 0      | 0      |
| Or42a    | 1    | 1    | 1    | 1    | 1    | 1    | 2    | 2    | 1    | 2    | 2    | 1    | 2    | 0      | 2      |
| Or42b    | 1    | 1    | 1    | 1    | 1    | 1    | 1    | 1    | 1    | 1    | 1    | 7    | 6    | 0      | 6      |
| Or43a    | 1    | 1    | 1    | 1    | 1    | 1    | 1    | 0    | 1    | 1    | 1    | 1    | 0    | 1      | 1      |
| Or43b    | 1    | 1    | 1    | 1    | 1    | 1    | 1    | 1    | 1    | 0    | 0    | 0    | 0    | 1      | 1      |
| Or45a    | 1    | 1    | 1    | 1    | 1    | 1    | 1    | 1    | 1    | 0    | 0    | 0    | 0    | 1      | 1      |
| Or45b    | 1    | 1    | 1    | 1    | 1    | 1    | 1    | 1    | 0    | 1    | 1    | 1    | 0    | 1      | 1      |
| Or46a    | 2    | 2    | 2    | 2    | 2    | 2    | 2    | 2    | 2    | 1    | 1    | 3    | 3    | 0      | 3      |
| Or47a    | 1    | 1    | 1    | 1    | 1    | 1    | 1    | 1    | 1    | 0    | 0    | 0    | 0    | 1      | 1      |
| Or47b    | 1    | 1    | 1    | 1    | 1    | 1    | 1    | 1    | 1    | 2    | 1    | 1    | 1    | 0      | 1      |
| Or49a    | 1    | 1    | 1    | 1    | 1    | 1    | 2    | 2    | 1    | 1    | 1    | 2    | 2    | 0      | 2      |
| Or49b    | 1    | 1    | 1    | 1    | 1    | 1    | 1    | 1    | 1    | 1    | 1    | 1    | 0    | 0      | 0      |
| Or56a    | 1    | 1    | 1    | 1    | 1    | 1    | 1    | 0    | 1    | 1    | 1    | 2    | 1    | 0      | 1      |
| Or59a    | 1    | 1    | 1    | 1    | 1    | 1    | 1    | 1    | 2    | 1    | 3    | 3    | 4    | 0      | 4      |
| Or59b    | 1    | 1    | 1    | 1    | 1    | 1    | 1    | 1    | 1    | 1    | 2    | 2    | 2    | 0      | 2      |
| Or59c    | 1    | 1    | 1    | 1    | 1    | 1    | 1    | 1    | 1    | 0    | 0    | 0    | 0    | 1      | 1      |
| Or63a    | 1    | 1    | 1    | 1    | 1    | 1    | 1    | 1    | 1    | 1    | 1    | 1    | 0    | 0      | 0      |
| Or65abc  | 3    | 3    | 2    | 4    | 3    | 3    | 5    | 2    | 2    | 1    | 1    | 0    | 10   | 5      | 15     |
| Or67a    | 1    | 2    | 1    | 2    | 1    | 1    | 1    | 0    | 3    | 2    | 2    | 2    | 5    | 1      | 6      |
| Or67b    | 1    | 1    | 1    | 1    | 1    | 1    | 1    | 1    | 1    | 1    | 1    | 1    | 0    | 0      | 0      |
| Or67c    | 1    | 1    | 1    | 1    | 1    | 1    | 1    | 1    | 1    | 1    | 1    | 1    | 0    | 0      | 0      |
| Or67d    | 1    | 1    | 1    | 1    | 1    | 1    | 1    | 1    | 0    | 1    | 1    | 1    | 0    | 1      | 1      |
| Or67dB   | 0    | 0    | 0    | 0    | 0    | 1    | 0    | 0    | 1    | 0    | 0    | 2    | 1    | 3      | 4      |
| Or69a    | 2    | 3    | 2    | 3    | 3    | 1    | 2    | 2    | 1    | 1    | 1    | 2    | 3    | 3      | 6      |
| Or71a    | 1    | 1    | 1    | 1    | 1    | 1    | 1    | 0    | 1    | 1    | 1    | 1    | 0    | 1      | 1      |
| Or74a    | 1    | 1    | 1    | 1    | 1    | 1    | 1    | 1    | 1    | 1    | 1    | 2    | 0    | 1      | 1      |
| Or82a    | 1    | 1    | 1    | 1    | 1    | 1    | 1    | 1    | 2    | 1    | 1    | 1    | 1    | 0      | 1      |
| Or83a    | 1    | 1    | 1    | 1    | 1    | 1    | 1    | 1    | 1    | 1    | 1    | 1    | 0    | 0      | 0      |
| Or83b    | 1    | 1    | 1    | 1    | 1    | 2    | 1    | 1    | 1    | 1    | 1    | 1    | 1    | 0      | 1      |
| Or83c    | 1    | 1    | 1    | 1    | 1    | 1    | 1    | 1    | 1    | 1    | 1    | 1    | 0    | 0      | 0      |
| Or83c2   | 0    | 0    | 0    | 0    | 0    | 0    | 0    | 0    | 1    | 1    | 1    | 0    | 0    | 2      | 2      |
| Or85a    | 1    | 1    | 1    | 1    | 1    | 0    | 0    | 0    | 1    | 2    | 0    | 0    | 1    | 4      | 5      |
| Or85bc   | 2    | 2    | 2    | 2    | 2    | 2    | 2    | 0    | 1    | 2    | 1    | 1    | 2    | 2      | 4      |
| Or85d    | 1    | 1    | 1    | 1    | 1    | 1    | 1    | 1    | 1    | 1    | 1    | 1    | 0    | 0      | 0      |
| Or85e    | 1    | 1    | 1    | 1    | 1    | 1    | 1    | 1    | 1    | 1    | 1    | 1    | 0    | 0      | 0      |
| Or85f    | 1    | 1    | 1    | 1    | 1    | 1    | 1    | 1    | 6    | 1    | 1    | 1    | 1    | 0      | 1      |
| Or88a    | 1    | 1    | 1    | 1    | 1    | 0    | 1    | 1    | 1    | 1    | 1    | 1    | 0    | 1      | 1      |
| Or92a    | 1    | 1    | 1    | 2    | 1    | 1    | 1    | 1    | 1    | 1    | 1    | 1    | 1    | 0      | 1      |
| Or94a    | 1    | 1    | 1    | 1    | 1    | 1    | 1    | 1    | 1    | 1    | 0    | 1    | 0    | 1      | 1      |
| Or94b    | 1    | 1    | 1    | 1    | 1    | 1    | 1    | 0    | 1    | 1    | 1    | 1    | 0    | 1      | 1      |
| Or98a    | 1    | 1    | 1    | 2    | 2    | 3    | 3    | 2    | 4    | 3    | 3    | 2    | 8    | 2      | 10     |
| Or98b    | 1    | 1    | 0    | 1    | 1    | 1    | 1    | 1    | 1    | 0    | 1    | 0    | 0    | 3      | 3      |
| OrN1     | 0    | 0    | 0    | 0    | 0    | 0    | 1    | 0    | 3    | 1    | 1    | 1    | 2    | 2      | 4      |
| OrN2     | 0    | 0    | 0    | 0    | 0    | 0    | 0    | 0    | 0    | 5    | 2    | 1    | 5    | 1      | 6      |
| Total    | 62   | 63   | 57   | 65   | 62   | 68   | 67   | 55   | 71   | 62   | 56   | 66   | 76   | 49     | 125    |

Table S3. GR ortholog groups (OG), number of copies per species, total number of gains, losses, and events.

| OG       | dmel | dsim | dsec | dyak | dere | dana | dpse | dwil | dmoj | dvir | dgri | gains | losses | events |
|----------|------|------|------|------|------|------|------|------|------|------|------|-------|--------|--------|
| Gr02a    | 1    | 1    | 1    | 1    | 1    | 1    | 1    | 1    | 1    | 1    | 1    | 0     | 0      | 0      |
| Gr05a    | 1    | 1    | 1    | 1    | 1    | 1    | 0    | 1    | 1    | 1    | 0    | 0     | 2      | 2      |
| Gr08a    | 1    | 1    | 1    | 1    | 1    | 1    | 1    | 1    | 1    | 1    | 1    | 0     | 0      | 0      |
| Gr09a    | 1    | 1    | 1    | 1    | 1    | 1    | 1    | 1    | 1    | 1    | 1    | 0     | 0      | 0      |
| Gr10a    | 1    | 1    | 1    | 1    | 1    | 1    | 1    | 1    | 1    | 1    | 1    | 0     | 0      | 0      |
| Gr10b    | 1    | 1    | 1    | 1    | 1    | 1    | 1    | 1    | 0    | 0    | 0    | 0     | 2      | 2      |
| Gr21a    | 1    | 1    | 1    | 1    | 1    | 1    | 1    | 1    | 1    | 1    | 1    | 0     | 0      | 0      |
| Gr22a    | 6    | 6    | 3    | 6    | 5    | 4    | 3    | 5    | 1    | 1    | 0    | 8     | 9      | 17     |
| Gr23a    | 1    | 1    | 1    | 1    | 1    | 1    | 1    | 1    | 1    | 1    | 1    | 0     | 0      | 0      |
| Gr28a    | 1    | 1    | 1    | 1    | 1    | 1    | 1    | 1    | 1    | 1    | 1    | 0     | 0      | 0      |
| Gr28b    | 1    | 1    | 1    | 1    | 1    | 1    | 1    | 1    | 1    | 1    | 1    | 0     | 0      | 0      |
| Gr32a    | 1    | 1    | 1    | 1    | 1    | 1    | 1    | 1    | 1    | 1    | 1    | 0     | 0      | 0      |
| Gr33a    | 1    | 1    | 1    | 1    | 1    | 1    | 1    | 1    | 1    | 1    | 1    | 0     | 1      | 1      |
| Gr36abc  | 3    | 3    | 3    | 2    | 1    | 4    | 1    | 2    | 0    | 0    | 0    | 6     | 3      | 9      |
| Gr39a    | 1    | 1    | 1    | 1    | 1    | 1    | 1    | 1    | 1    | 1    | 1    | 0     | 0      | 0      |
| Gr39b    | 1    | 1    | 0    | 1    | 1    | 1    | 1    | 1    | 1    | 1    | 1    | 0     | 1      | 1      |
| Gr43a    | 1    | 1    | 1    | 1    | 1    | 1    | 1    | 1    | 1    | 1    | 1    | 0     | 0      | 0      |
| Gr47a    | 1    | 1    | 1    | 1    | 0    | 1    | 1    | 1    | 0    | 0    | 1    | 0     | 3      | 3      |
| Gr47b    | 1    | 1    | 1    | 1    | 1    | 1    | 1    | 1    | 1    | 1    | 2    | 1     | 0      | 1      |
| Gr57a    | 1    | 1    | 1    | 1    | 1    | 1    | 1    | 1    | 1    | 1    | 1    | 0     | 0      | 0      |
| Gr58a    | 1    | 1    | 0    | 1    | 1    | 1    | 1    | 1    | 0    | 0    | 0    | 0     | 2      | 2      |
| Gr58b    | 1    | 1    | 1    | 1    | 1    | 1    | 1    | 1    | 1    | 1    | 1    | 0     | 0      | 0      |
| Gr58c    | 1    | 1    | 1    | 1    | 1    | 1    | 1    | 1    | 1    | 1    | 0    | 0     | 1      | 1      |
| Gr59ab   | 2    | 2    | 3    | 3    | 3    | 4    | 4    | 3    | 1    | 2    | 4    | 10    | 4      | 14     |
| Gr59cd   | 2    | 3    | 2    | 2    | 2    | 2    | 2    | 8    | 3    | 4    | 7    | 18    | 4      | 22     |
| Gr59e    | 1    | 1    | 1    | 1    | 1    | 1    | 1    | 1    | 1    | 1    | 1    | 0     | 0      | 0      |
| Gr59f    | 1    | 1    | 1    | 1    | 1    | 1    | 1    | 0    | 1    | 1    | 1    | 0     | 1      | 1      |
| Gr61a    | 1    | 1    | 1    | 1    | 1    | 1    | 1    | 1    | 1    | 1    | 2    | 0     | 1      | 1      |
| Gr63a    | 1    | 1    | 1    | 1    | 1    | 1    | 1    | 1    | 1    | 1    | 1    | 0     | 0      | 0      |
| Gr64a    | 1    | 1    | 1    | 1    | 1    | 1    | 1    | 1    | 1    | 1    | 1    | 0     | 0      | 0      |
| Gr64b    | 1    | 1    | 1    | 1    | 1    | 1    | 1    | 1    | 1    | 1    | 1    | 0     | 0      | 0      |
| Gr64cd   | 2    | 2    | 2    | 2    | 2    | 2    | 2    | 2    | 1    | 1    | 1    | 1     | 1      | 2      |
| Gr64e    | 1    | 1    | 1    | 1    | 1    | 1    | 1    | 1    | 1    | 1    | 1    | 0     | 0      | 0      |
| Gr64f    | 1    | 1    | 1    | 1    | 1    | 1    | 1    | 1    | 1    | 1    | 1    | 0     | 0      | 0      |
| Gr66a    | 1    | 1    | 1    | 1    | 1    | 1    | 1    | 1    | 1    | 1    | 1    | 0     | 1      | 1      |
| Gr68a    | 1    | 1    | 1    | 1    | 1    | 1    | 1    | 1    | 1    | 1    | 1    | 0     | 0      | 0      |
| Gr77a    | 1    | 1    | 1    | 1    | 1    | 1    | 1    | 1    | 1    | 1    | 1    | 0     | 0      | 0      |
| Gr85a    | 1    | 1    | 1    | 2    | 1    | 2    | 1    | 5    | 4    | 5    | 14   | 19    | 12     | 31     |
| Gr89a    | 1    | 1    | 1    | 1    | 1    | 1    | 1    | 1    | 1    | 1    | 2    | 0     | 1      | 1      |
| Gr92a93d | 2    | 3    | 1    | 3    | 0    | 5    | 1    | 0    | 0    | 0    | 0    | 6     | 8      | 14     |
| Gr93a    | 1    | 1    | 1    | 1    | 1    | 1    | 1    | 1    | 1    | 1    | 1    | 0     | 0      | 0      |
| Gr93b    | 1    | 1    | 1    | 1    | 0    | 1    | 1    | 5    | 0    | 0    | 0    | 4     | 3      | 7      |
| Gr93c    | 1    | 1    | 1    | 1    | 1    | 1    | 1    | 1    | 4    | 1    | 2    | 3     | 1      | 4      |
| Gr94a    | 1    | 1    | 1    | 1    | 1    | 1    | 1    | 1    | 1    | 0    | 1    | 0     | 1      | 1      |
| Gr97a    | 1    | 1    | 1    | 1    | 1    | 1    | 1    | 1    | 1    | 1    | 1    | 0     | 0      | 0      |
| Gr98a    | 1    | 1    | 0    | 1    | 1    | 1    | 0    | 1    | 2    | 3    | 2    | 4     | 3      | 7      |
| Gr98bcd  | 3    | 3    | 2    | 4    | 3    | 2    | 1    | 1    | 1    | 1    | 1    | 4     | 3      | 7      |
| Total    | 60   | 62   | 53   | 63   | 54   | 64   | 52   | 68   | 50   | 50   | 66   | 84    | 68     | 152    |

Table S4. IR ortholog groups (OG), number of copies per species, total number of gains, losses, and events. *OGs* in italics are the antennal ones.

| OG           | dmel | dsim | dsec | dyak | dere | dana | dpse | dwil | dmoj | dvir | dgri | gains | losses | events |
|--------------|------|------|------|------|------|------|------|------|------|------|------|-------|--------|--------|
| <i>Ir08a</i> | 1    | 1    | 1    | 1    | 1    | 1    | 1    | 1    | 1    | 1    | 1    | 0     | 0      | 0      |
| <i>Ir21a</i> | 1    | 1    | 1    | 1    | 1    | 1    | 1    | 1    | 1    | 1    | 1    | 0     | 0      | 0      |
| <i>Ir25a</i> | 1    | 1    | 1    | 1    | 1    | 1    | 1    | 1    | 1    | 1    | 1    | 0     | 0      | 0      |
| <i>Ir31a</i> | 1    | 1    | 1    | 1    | 1    | 1    | 1    | 1    | 1    | 1    | 1    | 0     | 0      | 0      |
| <i>Ir40a</i> | 1    | 1    | 1    | 1    | 1    | 1    | 1    | 1    | 1    | 1    | 1    | 0     | 0      | 0      |
| <i>Ir41a</i> | 1    | 1    | 1    | 1    | 1    | 0    | 1    | 1    | 1    | 1    | 1    | 0     | 1      | 1      |
| <i>Ir64a</i> | 1    | 1    | 1    | 1    | 1    | 1    | 1    | 1    | 1    | 1    | 1    | 0     | 0      | 0      |
| <i>Ir68a</i> | 1    | 1    | 1    | 1    | 1    | 1    | 1    | 1    | 1    | 1    | 1    | 0     | 0      | 0      |
| <i>Ir75a</i> | 1    | 1    | 0    | 1    | 1    | 1    | 1    | 1    | 1    | 1    | 1    | 0     | 1      | 1      |
| <i>Ir75b</i> | 1    | 1    | 1    | 1    | 1    | 1    | 1    | 1    | 1    | 1    | 1    | 0     | 0      | 0      |
| <i>Ir75c</i> | 1    | 1    | 1    | 1    | 1    | 1    | 1    | 1    | 1    | 1    | 1    | 0     | 0      | 0      |
| <i>Ir76a</i> | 1    | 1    | 1    | 1    | 1    | 1    | 1    | 1    | 1    | 1    | 1    | 0     | 0      | 0      |
| <i>Ir84a</i> | 1    | 1    | 1    | 1    | 1    | 1    | 1    | 1    | 1    | 1    | 1    | 0     | 0      | 0      |
| <i>Ir92a</i> | 1    | 1    | 1    | 1    | 1    | 1    | 1    | 1    | 1    | 1    | 1    | 0     | 0      | 0      |
| <i>Ir93a</i> | 1    | 1    | 1    | 1    | 1    | 1    | 1    | 1    | 1    | 1    | 1    | 0     | 0      | 0      |
| Ir07a        | 1    | 1    | 1    | 1    | 1    | 1    | 1    | 1    | 1    | 1    | 1    | 0     | 0      | 0      |
| Ir07b        | 1    | 1    | 1    | 1    | 1    | 1    | 1    | 1    | 1    | 1    | 1    | 0     | 0      | 0      |
| Ir07c        | 1    | 1    | 1    | 1    | 1    | 1    | 1    | 1    | 1    | 1    | 1    | 0     | 0      | 0      |
| Ir07d        | 1    | 1    | 1    | 1    | 1    | 1    | 1    | 1    | 1    | 1    | 2    | 1     | 0      | 1      |
| Ir07e        | 1    | 1    | 1    | 1    | 1    | 1    | 1    | 1    | 0    | 0    | 3    | 4     | 4      | 8      |
| Ir07f        | 1    | 1    | 1    | 1    | 1    | 1    | 1    | 1    | 1    | 1    | 1    | 0     | 0      | 0      |
| Ir07g        | 1    | 1    | 1    | 1    | 1    | 1    | 1    | 0    | 0    | 1    | 1    | 0     | 2      | 2      |
| Ir10a        | 0    | 1    | 1    | 1    | 1    | 1    | 1    | 1    | 1    | 1    | 1    | 0     | 1      | 1      |
| Ir11a        | 1    | 1    | 1    | 1    | 1    | 1    | 1    | 1    | 0    | 1    | 0    | 0     | 2      | 2      |
| Ir20a94h     | 2    | 2    | 2    | 2    | 2    | 1    | 1    | 1    | 1    | 1    | 1    | 1     | 1      | 2      |
| Ir47a        | 1    | 2    | 0    | 1    | 1    | 1    | 1    | 0    | 1    | 1    | 1    | 1     | 3      | 4      |
| Ir48ab       | 1    | 2    | 1    | 2    | 1    | 2    | 1    | 1    | 1    | 1    | 1    | 1     | 3      | 4      |
| Ir48c        | 1    | 1    | 1    | 1    | 1    | 0    | 1    | 1    | 0    | 0    | 0    | 0     | 1      | 1      |
| Ir48d        | 0    | 0    | 0    | 0    | 0    | 0    | 1    | 1    | 1    | 1    | 1    | 0     | 1      | 1      |
| Ir51ab       | 1    | 2    | 2    | 2    | 2    | 2    | 2    | 2    | 1    | 1    | 1    | 2     | 1      | 3      |
| Ir52         | 4    | 6    | 4    | 5    | 5    | 4    | 2    | 1    | 3    | 1    | 6    | 10    | 8      | 18     |
| Ir54a        | 1    | 1    | 1    | 1    | 1    | 1    | 1    | 1    | 1    | 1    | 1    | 0     | 0      | 0      |
| Ir56a        | 1    | 1    | 1    | 1    | 1    | 1    | 1    | 1    | 1    | 1    | 1    | 0     | 0      | 0      |
| Ir56b        | 1    | 1    | 1    | 1    | 1    | 1    | 1    | 1    | 1    | 1    | 1    | 0     | 0      | 0      |
| Ir56c        | 1    | 1    | 1    | 1    | 1    | 0    | 1    | 2    | 1    | 1    | 1    | 1     | 1      | 2      |
| Ir56d        | 1    | 1    | 1    | 1    | 1    | 1    | 1    | 2    | 1    | 1    | 1    | 1     | 0      | 1      |
| Ir56e        | 0    | 0    | 0    | 0    | 0    | 0    | 0    | 1    | 1    | 1    | 1    | 0     | 1      | 1      |
| Ir60a        | 1    | 1    | 1    | 1    | 1    | 1    | 1    | 1    | 1    | 1    | 1    | 0     | 0      | 0      |
| Ir60b        | 2    | 3    | 2    | 3    | 4    | 4    | 3    | 2    | 1    | 1    | 1    | 4     | 5      | 9      |
| Ir60e        | 0    | 1    | 1    | 1    | 1    | 1    | 1    | 1    | 1    | 0    | 1    | 0     | 2      | 2      |
| Ir62a        | 1    | 1    | 1    | 1    | 1    | 1    | 1    | 1    | 1    | 1    | 1    | 0     | 0      | 0      |
| Ir67a        | 0    | 1    | 1    | 1    | 1    | 1    | 1    | 1    | 1    | 1    | 1    | 0     | 1      | 1      |
| Ir67b        | 1    | 1    | 1    | 1    | 1    | 1    | 1    | 0    | 1    | 1    | 1    | 0     | 1      | 1      |
| Ir67c        | 1    | 1    | 0    | 1    | 1    | 1    | 1    | 1    | 0    | 0    | 0    | 0     | 1      | 1      |
| Ir68b        | 1    | 1    | 1    | 1    | 1    | 1    | 1    | 2    | 2    | 1    | 1    | 2     | 0      | 2      |
| Ir75d        | 1    | 1    | 1    | 1    | 1    | 1    | 1    | 1    | 2    | 1    | 1    | 1     | 0      | 1      |
| Ir76b        | 1    | 1    | 1    | 1    | 1    | 1    | 1    | 1    | 1    | 1    | 2    | 1     | 0      | 1      |
| Ir85a        | 1    | 1    | 1    | 1    | 1    | 1    | 1    | 1    | 1    | 1    | 1    | 0     | 0      | 0      |
| Ir87a        | 1    | 1    | 1    | 1    | 1    | 1    | 1    | 1    | 1    | 1    | 1    | 0     | 0      | 0      |
| Ir94abc      | 3    | 4    | 1    | 4    | 2    | 5    | 2    | 3    | 3    | 4    | 1    | 13    | 7      | 20     |
| Ir94d        | 1    | 1    | 1    | 1    | 1    | 1    | 1    | 1    | 0    | 1    | 0    | 0     | 2      | 2      |
| Ir94e        | 1    | 1    | 1    | 1    | 1    | 1    | 1    | 1    | 2    | 1    | 2    | 2     | 0      | 2      |
| Ir94f        | 1    | 1    | 1    | 1    | 1    | 1    | 0    | 2    | 1    | 1    | 2    | 2     | 1      | 3      |
| Ir94g        | 1    | 1    | 1    | 1    | 1    | 1    | 1    | 1    | 1    | 1    | 1    | 0     | 0      | 0      |
| Ir100a       | 1    | 1    | 1    | 1    | 1    | 1    | 1    | 1    | 1    | 1    | 1    | 0     | 0      | 0      |
| Total        | 55   | 65   | 54   | 63   | 61   | 60   | 56   | 58   | 54   | 52   | 60   | 47    | 51     | 98     |

Table S5. Gene birth and death rate estimates (birth – death) for four chemosensory gene families and two IR subfamilies using different methods

| method                                      | OG? <sup>a</sup> | OBP                          | OR                           | GR              | IR              | divergent IR    | antennal IR     |
|---------------------------------------------|------------------|------------------------------|------------------------------|-----------------|-----------------|-----------------|-----------------|
| <b>Using Vieira et al. (2007) equations</b> |                  |                              |                              |                 |                 |                 |                 |
| GT-ST-Rec+ $\psi$                           | Y                | 0.0025 - 0.0014 <sup>b</sup> | n.a.                         | 0.0057 - 0.0032 | 0.0026 - 0.0027 | 0.0037 - 0.0037 | 0.0001 - 0.0003 |
| GT-ST-Rec                                   | Y                | 0.0022 - 0.0011              | 0.0036 - 0.0019              | 0.0050 - 0.0026 | 0.0021 - 0.0023 | 0.0030 - 0.0031 | 0.0001 - 0.0003 |
| BadiRate CWP                                | Y                | 0.0019 - 0.0011              | 0.0023 - 0.0018              | 0.0019 - 0.0023 | 0.0014 - 0.0016 | 0.0020 - 0.0022 | 0.0001 - 0.0003 |
| BadiRate CSP                                | Y                | 0.0021 - 0.0009              | 0.0037 - 0.0013              | 0.0029 - 0.0019 | 0.0017 - 0.0017 | 0.0026 - 0.0022 | 0.0001 - 0.0003 |
| BadiRate CML                                | Y                | 0.0021 - 0.0009              | 0.0021 - 0.0020              | 0.0036 - 0.0016 | 0.0019 - 0.0015 | 0.0029 - 0.0020 | 0.0001 - 0.0003 |
| <b>“Branch average” approach</b>            |                  |                              |                              |                 |                 |                 |                 |
| GT-ST-Rec-Av+ $\psi$                        | Y                | 0.0027 - 0.0021              | n.a.                         | 0.0083 - 0.0126 | 0.0020 - 0.0128 | 0.0028 - 0.0162 | 0.0001 - 0.0003 |
| GT-ST-Rec-Av                                | Y                | 0.0025 - 0.0020              | 0.0034 - 0.0076              | 0.0081 - 0.0123 | 0.0018 - 0.0126 | 0.0025 - 0.0159 | 0.0001 - 0.0003 |
| BadiRate CWP-Av                             | Y                | 0.0012 - 0.0022              | 0.0037 - 0.0066              | 0.0053 - 0.0110 | 0.0062 - 0.074  | 0.0087 - 0.0093 | 0.0001 - 0.0028 |
| BadiRate BD-GR-ML                           | N                | 0.0065 - 0.0052              | 0.0136 - 0.0132              | 0.0393 - 0.0372 | 0.0434 - 0.0442 | 0.0500 - 0.0511 | 0.0002 - 0.0003 |
| BadiRate L-GR-ML                            | N                | 0.0061                       | 0.0134                       | 0.0398          | 0.0438          | 0.0505          | 0.0003          |
| <b>Without <i>D. sechellia</i></b>          |                  |                              |                              |                 |                 |                 |                 |
| GT-ST-Rec+ $\psi$                           | Y                | 0.0025 - 0.0013              | 0.0036 - 0.0017 <sup>c</sup> | 0.0057 - 0.0028 | 0.0026 - 0.0023 | 0.0037 - 0.0032 | 0.0001 - 0.0002 |
| GT-ST-Rec-Av+ $\psi$                        | Y                | 0.0030 - 0.0013              | 0.0038 - 0.0032 <sup>c</sup> | 0.0091 - 0.0031 | 0.0022 - 0.0038 | 0.0031 - 0.0051 | 0.0001 - 0.0001 |
| BadiRate CWP                                | Y                | 0.0019 - 0.0011              | 0.0023 - 0.0017              | 0.0018 - 0.0020 | 0.0012 - 0.0016 | 0.0012 - 0.0016 | 0.0001 - 0.0001 |
| BadiRate CWP-Av                             | Y                | 0.0013 - 0.0014              | 0.0022 - 0.0039              | 0.0033 - 0.0051 | 0.0014 - 0.0043 | 0.0019 - 0.0061 | 0.0001 - 0.0001 |
| BadiRate CSP                                | Y                | 0.0021 - 0.0009              | 0.0034 - 0.0013              | 0.0029 - 0.0018 | 0.0017 - 0.0017 | 0.0026 - 0.0022 | 0.0001 - 0.0001 |
| BadiRate CML                                | Y                | 0.0016 - 0.0018              | 0.0019 - 0.0020              | 0.0027 - 0.0015 | 0.0010 - 0.0018 | 0.0016 - 0.0022 | 0.0001 - 0.0001 |
| BadiRate BD-GR-ML                           | N                | 0.0063 - 0.0050              | 0.0031 - 0.0024              | 0.0133 - 0.0110 | 0.0090 - 0.0096 | 0.0128 - 0.0136 | 0.0002 - 0.0002 |

<sup>a</sup> Method relies on ortologous group information? Y= yes, N= no. <sup>b</sup> The values before and after the dash represent the gene birth and death rates, respectively. <sup>c</sup> Pseudogene information was not available and therefore not taken into account.

Table S6. Gene birth ( $\beta$ ) and death ( $\delta$ ) rate estimates per branch obtained with the GT-ST Rec-Av method.

| branch        | gains | losses | genes | gain rate | loss rate | time <sup>a</sup> | $\beta$ | $\delta$       |
|---------------|-------|--------|-------|-----------|-----------|-------------------|---------|----------------|
| <b>OBP</b>    |       |        |       |           |           |                   |         |                |
| sim           | 0     | 0      | 52    | 0         | 0         | 1                 | 0       | 0              |
| sec           | 0     | 1      | 51    | 0         | 0.0196    | 1                 | 0       | <b>0.0196</b>  |
| mel           | 0     | 0      | 52    | 0         | 0         | 5                 | 0       | 0              |
| (sim, sec)    | 0     | 0      | 52    | 0         | 0         | 4                 | 0       | 0              |
| (mel,sim,sec) | 0     | 0      | 52    | 0         | 0         | 8                 | 0       | 0              |
| yak           | 4     | 1      | 55    | 0.0727    | 0.0182    | 10                | 0.0073  | 0.0018         |
| ere           | 1     | 3      | 50    | 0.0200    | 0.0600    | 10                | 0.0020  | 0.0060         |
| (yak,ere)     | 0     | 0      | 52    | 0         | 0         | 3                 | 0       | 0              |
| (8,5)         | 4     | 0      | 52    | 0.0769    | 0         | 31                | 0.0025  | 0              |
| ana           | 5     | 3      | 50    | 0.1000    | 0.0600    | 44                | 0.0023  | 0.0014         |
| (10,9)        | 2     | 0      | 48    | 0.0417    | 0         | 11                | 0.0038  | 0              |
| pse           | 1     | 2      | 45    | 0.0222    | 0.0444    | 55                | 0.0004  | 0.0008         |
| (14,11)       | 0     | 1      | 46    | 0         | 0.0217    | 7                 | 0       | 0.0031         |
| wil           | 16    | 1      | 62    | 0.2581    | 0.0161    | 62                | 0.0042  | 0.0003         |
| (wil,15)      | 1     | 0      | 47    | 0.0213    | 0         | 1                 | 0.0213  | 0              |
| moj           | 1     | 1      | 43    | 0.0233    | 0.0233    | 31                | 0.0008  | 0.0008         |
| vir           | 0     | 2      | 41    | 0         | 0.0488    | 31                | 0       | 0.0016         |
| (moj,vir)     | 0     | 0      | 42    | 0         | 0         | 12                | 0       | 0              |
| gri           | 8     | 5      | 42    | 0.1905    | 0.1190    | 43                | 0.0044  | 0.0028         |
| (gri,20)      | 2     | 5      | 42    | 0.0476    | 0.1190    | 20                | 0.0024  | 0.0060         |
| <b>OR</b>     |       |        |       |           |           |                   |         |                |
| sim           | 3     | 1      | 61    | 0.0492    | 0.0164    | 1                 | 0.0492  | 0.01639        |
| sec           | 1     | 6      | 55    | 0.0182    | 0.1091    | 1                 | 0.0182  | <b>0.10909</b> |
| mel           | 1     | 1      | 62    | 0.0161    | 0.0161    | 5                 | 0.0032  | 0.00323        |
| (sim, sec)    | 0     | 3      | 59    | 0.0000    | 0.0508    | 4                 | 0       | 0.01271        |
| (mel,sim,sec) | 0     | 1      | 62    | 0.0000    | 0.0161    | 8                 | 0       | 0.00202        |
| yak           | 3     | 0      | 65    | 0.0462    | 0.0000    | 10                | 0.0046  | 0              |
| ere           | 0     | 0      | 62    | 0.0000    | 0.0000    | 10                | 0       | 0              |
| (yak,ere)     | 0     | 1      | 62    | 0.0000    | 0.0161    | 3                 | 0       | 0.00538        |
| (8,5)         | 3     | 1      | 63    | 0.0476    | 0.0159    | 31                | 0.0015  | 0.00051        |
| ana           | 10    | 3      | 68    | 0.1471    | 0.0441    | 44                | 0.0033  | 0.00100        |
| (10,9)        | 0     | 1      | 61    | 0.0000    | 0.0164    | 11                | 0       | 0.00149        |
| pse           | 8     | 2      | 64    | 0.1250    | 0.0313    | 55                | 0.0023  | 0.00057        |
| (14,11)       | 4     | 1      | 62    | 0.0645    | 0.0161    | 7                 | 0.0092  | 0.00230        |
| wil           | 15    | 1      | 73    | 0.2055    | 0.0137    | 62                | 0.0033  | 0.00022        |
| (wil,15)      | 2     | 0      | 59    | 0.0339    | 0.0000    | 1                 | 0.0339  | 0              |
| moj           | 9     | 1      | 61    | 0.1475    | 0.0164    | 31                | 0.0048  | 0.00053        |
| vir           | 5     | 5      | 53    | 0.0943    | 0.0943    | 31                | 0.0030  | 0.00304        |
| (moj,vir)     | 0     | 0      | 53    | 0.0000    | 0.0000    | 12                | 0       | 0              |
| gri           | 23    | 6      | 70    | 0.3286    | 0.0857    | 43                | 0.0076  | 0.00199        |
| (gri,20)      | 2     | 6      | 53    | 0.0377    | 0.1132    | 20                | 0.0019  | 0.00566        |
| <b>GR</b>     |       |        |       |           |           |                   |         |                |
| sim           | 0     | 2      | 62    | 0.0000    | 0.0323    | 1                 | 0       | 0.0323         |
| sec           | 0     | 11     | 53    | 0.0000    | 0.2075    | 1                 | 0       | <b>0.2075</b>  |
| mel           | 0     | 2      | 60    | 0.0000    | 0.0333    | 5                 | 0       | 0.0067         |
| (sim, sec)    | 2     | 0      | 64    | 0.0313    | 0.0000    | 4                 | 0.0078  | 0              |
| (mel,sim,sec) | 0     | 0      | 62    | 0.0000    | 0.0000    | 8                 | 0       | 0              |
| yak           | 1     | 0      | 63    | 0.0159    | 0.0000    | 10                | 0.0016  | 0              |
| ere           | 0     | 8      | 54    | 0.0000    | 0.1481    | 10                | 0       | 0.0148         |
| (yak,ere)     | 1     | 1      | 62    | 0.0161    | 0.0161    | 3                 | 0.0054  | 0.0054         |
| (8,5)         | 5     | 0      | 62    | 0.0806    | 0.0000    | 31                | 0.0026  | 0              |

|           |    |    |    |        |        |    |        |        |
|-----------|----|----|----|--------|--------|----|--------|--------|
| ana       | 16 | 9  | 64 | 0.2500 | 0.1406 | 44 | 0.0057 | 0.0032 |
| (10,9)    | 4  | 0  | 57 | 0.0702 | 0.0000 | 11 | 0.0064 | 0      |
| pse       | 3  | 5  | 52 | 0.0577 | 0.0962 | 55 | 0.0010 | 0.0017 |
| (14,11)   | 3  | 0  | 54 | 0.0556 | 0.0000 | 7  | 0.0079 | 0      |
| wil       | 23 | 6  | 68 | 0.3382 | 0.0882 | 62 | 0.0055 | 0.0014 |
| (wil,15)  | 4  | 0  | 51 | 0.0784 | 0.0000 | 1  | 0.0784 | 0      |
| moj       | 3  | 2  | 50 | 0.0600 | 0.0400 | 31 | 0.0019 | 0.0013 |
| vir       | 4  | 3  | 50 | 0.0800 | 0.0600 | 31 | 0.0026 | 0.0019 |
| (moj,vir) | 5  | 1  | 49 | 0.1020 | 0.0204 | 12 | 0.0085 | 0.0017 |
| gri       | 34 | 13 | 66 | 0.5152 | 0.1970 | 43 | 0.0120 | 0.0046 |
| (gri,20)  | 3  | 5  | 45 | 0.0667 | 0.1111 | 20 | 0.0033 | 0.0056 |

#### IR

|               |    |    |    |        |        |    |        |               |
|---------------|----|----|----|--------|--------|----|--------|---------------|
| sim           | 0  | 1  | 67 | 0      | 0.0149 | 1  | 0      | 0.0149        |
| sec           | 0  | 12 | 56 | 0      | 0.2143 | 1  | 0      | <b>0.2143</b> |
| mel           | 0  | 10 | 57 | 0      | 0.1754 | 5  | 0      | <b>0.0351</b> |
| (sim, sec)    | 0  | 0  | 68 | 0      | 0      | 4  | 0      | 0             |
| (mel,sim,sec) | 0  | 0  | 68 | 0      | 0      | 8  | 0      | 0             |
| yak           | 0  | 2  | 65 | 0      | 0.0308 | 10 | 0      | 0.0031        |
| ere           | 0  | 4  | 63 | 0      | 0.0635 | 10 | 0      | 0.0063        |
| (yak,ere)     | 0  | 1  | 67 | 0      | 0.0149 | 3  | 0      | 0.0050        |
| (8,5)         | 6  | 0  | 68 | 0.0882 | 0      | 31 | 0.0028 | 0             |
| ana           | 4  | 4  | 62 | 0.0645 | 0.0645 | 44 | 0.0015 | 0.0015        |
| (10,9)        | 6  | 1  | 62 | 0.0968 | 0.0161 | 11 | 0.0088 | 0.0015        |
| pse           | 2  | 1  | 58 | 0.0345 | 0.0172 | 55 | 0.0006 | 0.0003        |
| (14,11)       | 3  | 1  | 57 | 0.0526 | 0.0175 | 7  | 0.0075 | 0.0025        |
| wil           | 13 | 9  | 60 | 0.2167 | 0.1500 | 62 | 0.0035 | 0.0024        |
| (wil,15)      | 0  | 0  | 55 | 0      | 0      | 1  | 0      | 0             |
| moj           | 6  | 6  | 56 | 0.1071 | 0.1071 | 31 | 0.0035 | 0.0035        |
| vir           | 3  | 5  | 54 | 0.0556 | 0.0926 | 31 | 0.0018 | 0.0030        |
| (moj,vir)     | 1  | 0  | 56 | 0.0179 | 0.0000 | 12 | 0.0015 | 0             |
| gri           | 10 | 5  | 60 | 0.1667 | 0.0833 | 43 | 0.0039 | 0.0019        |
| (gri,20)      | 2  | 2  | 55 | 0.0364 | 0.0364 | 20 | 0.0018 | 0.0018        |

<sup>a</sup> In million years

Table S7. Results of the branch model analyses of gene birth ( $\beta$ ) and death ( $\delta$ ) rates using BadiRate BD-BR-ML. L = likelihood, AIC = Akaike information criterion, int = internal branches, ext = external branches. See main text for description of the models.

| All families          |    |                      |               |             |              |             |              |               |                |
|-----------------------|----|----------------------|---------------|-------------|--------------|-------------|--------------|---------------|----------------|
| model                 | np | L                    | AIC           | int $\beta$ | int $\delta$ | ext $\beta$ | ext $\delta$ | focal $\beta$ | focal $\delta$ |
| <i>MGr</i>            | 4  | -158.12              | 324.25        | 0.0005      | 0.0005       | 0.0322      | 0.0317       | n.a.          | n.a.           |
| <b><i>Msec</i></b>    | 6  | -140.10              | <b>292.19</b> | 0.0047      | 0.0047       | 0.0092      | 0.0085       | 0.0338        | 0.1453         |
| <i>Mgri</i>           | 6  | -156.33              | 324.67        | 0.0020      | 0.0022       | 0.0043      | 0.0026       | 0.0341        | 0.0336         |
| <i>Mspe</i>           | 6  | -152.58              | 317.16        | 0.0025      | 0.0021       | 0.0133      | 0.0126       | 0.1139        | 0.1176         |
| <i>Mend</i>           | 6  | -148.51              | 309.02        | 0.0048      | 0.0049       | 0.2069      | 0.2069       | 0.0093        | 0.0088         |
| <i>Mspeend</i>        | 6  | -155.82              | 323.64        | 0.0015      | 0.0011       | 0.0164      | 0.0159       | 0.0784        | 0.0794         |
| <i>Mspe-end-sec</i>   | 10 | -153.38 <sup>a</sup> | 326.77        | 0.0117      | 0.0128       | 0.0084      | 0.0072       | n.a.          | n.a.           |
| <i>MFr</i>            | 26 | <sup>a</sup>         |               |             |              |             |              |               |                |
| OBP family            |    |                      |               |             |              |             |              |               |                |
| model                 | np | L                    | AIC           | int $\beta$ | int $\delta$ | ext $\beta$ | ext $\delta$ | focal $\beta$ | focal $\delta$ |
| <i>MGr</i>            | 4  | -31.53               | <b>71.06</b>  | 0.0038      | 0.0032       | 0.0073      | 0.0059       | n.a.          | n.a.           |
| <i>Msec</i>           | 6  | -31.14               | 74.28         | 0.0046      | 0.0039       | 0.0067      | 0.0051       | 0.0000        | 0.0154         |
| <i>Mgri</i>           | 6  | -30.54               | 73.09         | 0.0017      | 0.0000       | 0.0000      | 0.0000       | 0.0097        | 0.0084         |
| <i>Mspe</i>           | 6  | -29.52               | <b>71.05</b>  | 0.0019      | 0.0000       | 0.0100      | 0.0081       | 0.0000        | 0.0020         |
| <i>Mend</i>           | 6  | -30.48               | 72.96         | 0.0016      | 0.0000       | 0.0000      | 0.0001       | 0.0108        | 0.0095         |
| <b><i>Mspeend</i></b> | 6  | -29.46               | <b>70.91</b>  | 0.0000      | 0.0000       | 0.0144      | 0.0145       | 0.0000        | 0.0036         |
| <i>Mspe-end-sec</i>   | 10 | <sup>a</sup>         |               |             |              |             |              |               |                |
| <i>MFr</i>            | 26 | <sup>a</sup>         |               |             |              |             |              |               |                |
| GR family             |    |                      |               |             |              |             |              |               |                |
| model                 | np | L                    | AIC           | int $\beta$ | int $\delta$ | ext $\beta$ | ext $\delta$ | focal $\beta$ | focal $\delta$ |
| <i>MGr</i>            | 4  | -40.84               | 89.68         | 0.0014      | 0.0000       | 0.0454      | 0.0434       | n.a.          | n.a.           |
| <b><i>Msec</i></b>    | 6  | -35.19               | <b>82.39</b>  | 0.0025      | 0.0000       | 0.0150      | 0.0133       | 0.0000        | 0.1442         |
| <i>Mgri</i>           | 6  | -39.27               | 90.53         | 0.0025      | 0.0021       | 0.0058      | 0.0000       | 0.0530        | 0.0503         |
| <i>Mspe</i>           | 6  | -37.19               | 86.37         | 0.0023      | 0.0000       | 0.0108      | 0.0085       | 0.1796        | 0.1883         |
| <i>Mend</i>           | 6  | -37.83               | 87.67         | 0.0025      | 0.0000       | 0.2928      | 0.2910       | 0.0145        | 0.0134         |
| <i>Mspeend</i>        | 6  | -38.46               | 88.91         | 0.0024      | 0.0000       | 0.0104      | 0.0085       | 0.1619        | 0.1633         |
| <i>Mspe-end-sec</i>   | 10 | <sup>a</sup>         |               |             |              |             |              |               |                |
| <i>MFr</i>            | 26 | <sup>a</sup>         |               |             |              |             |              |               |                |
| IR family             |    |                      |               |             |              |             |              |               |                |
| model                 | np | L                    | AIC           | int $\beta$ | int $\delta$ | ext $\beta$ | ext $\delta$ | focal $\beta$ | focal $\delta$ |
| <i>MGr</i>            | 4  | -41.40               | 90.80         | 0.0000      | 0.0000       | 0.0502      | 0.0511       | n.a.          | n.a.           |
| <b><i>Msec</i></b>    | 6  | -33.61               | <b>79.22</b>  | 0.0370      | 0.0367       | 0.0007      | 0.0013       | 0.0000        | 0.1790         |
| <i>Mgri</i>           | 6  | -39.45               | 90.89         | 0.0004      | 0.0001       | 0.0000      | 0.0000       | 0.0493        | 0.0497         |
| <i>Mspe</i>           | 6  | -39.61               | 91.21         | 0.0005      | 0.0000       | 0.0180      | 0.0199       | 0.2136        | 0.2208         |
| <i>Mend</i>           | 6  | -37.43               | 86.86         | 0.0408      | 0.0405       | 0.4512      | 0.4548       | 0.0008        | 0.0015         |
| <i>Mspeend</i>        | 6  | -40.73               | 93.45         | 0.0005      | 0.0000       | 0.0224      | 0.0242       | 0.1634        | 0.1673         |
| <i>Mspe-end-sec</i>   | 10 | <sup>a</sup>         |               |             |              |             |              |               |                |
| <i>MFr</i>            | 26 | <sup>a</sup>         |               |             |              |             |              |               |                |
| OR family             |    |                      |               |             |              |             |              |               |                |
| model                 | np | L                    | AIC           | int $\beta$ | int $\delta$ | ext $\beta$ | ext $\delta$ | focal $\beta$ | focal $\delta$ |
| <i>MGr</i>            | 4  | -36.30               | 80.60         | 0.0161      | 0.0143       | 0.0000      | 0.0002       | n.a.          | n.a.           |
| <b><i>Msec</i></b>    | 6  | -28.84               | <b>69.67</b>  | 0.1030      | 0.1882       | 0.0029      | 0.0021       | 0.0004        | 0.0014         |
| <i>Mgri</i>           | 6  | -36.42               | 84.84         | 0.0145      | 0.0143       | 0.0007      | 0.0000       | 0.0036        | 0.0059         |
| <i>Mspe</i>           | 6  | -33.45               | 78.91         | 0.2656      | 0.2663       | 0.0018      | 0.0002       | 0.0038        | 0.0052         |
| <i>Mend</i>           | 6  | -31.56               | 75.13         | 0.0031      | 0.0022       | 0.1347      | 0.1351       | 0.0007        | 0.0016         |
| <i>Mspeend</i>        | 6  | -34.42               | 80.85         | 0.1762      | 0.1739       | 0.0009      | 0.0000       | 0.0044        | 0.0068         |
| <i>Mspe-end-sec</i>   | 10 | <sup>a</sup>         |               |             |              |             |              |               |                |
| <i>MFr</i>            | 26 | <sup>a</sup>         |               |             |              |             |              |               |                |

<sup>a</sup> Not converged.



Table S8. Results of the gene conversion analysis.

| OG <sup>a</sup> | paralog 1      | paralog 2      | BC $p^b$ | length | total length | affect GT <sup>c</sup> ? | in tandem        |
|-----------------|----------------|----------------|----------|--------|--------------|--------------------------|------------------|
| IR60b           | DwilIR60m      | DwilIR60n      | <0.001   | 187    | 1840         | maybe                    | yes              |
|                 | Dper/DpseIR60j | Dper/DpseIR60k | <0.001   | 327    | 1840         | no                       | yes              |
| IR7eg           | Dgri7e1        | Dgri7e3        | 0.0039   | 262    | 2025         | maybe                    | yes              |
|                 | Dgri7e1        | Dgri7e2        | 0.034    | 536    | 2025         | maybe                    | no, but same chr |
| IR52b           | Dere/DsimIR52b | Dere/DsimIR52e | <0.001   | 146    | 2028         | maybe                    | yes              |
|                 | Dper/DpseIR52j | Dper/DpseIR52k | <0.001   | 355    | 2028         | likely                   | yes              |
|                 | DgriIR52q      | DgriIR52s      | <0.001   | 381    | 2028         | maybe                    | yes              |
|                 | DgriIR52q      | DgriIR52r      | <0.001   | 150    | 2028         | maybe                    | yes              |
|                 | DmojIR52n      | DmojIR52p      | 0.0018   | 98     | 2028         | maybe                    | yes              |
|                 | DmojIR52o      | DmojIR52p      | <0.001   | 230    | 2028         | maybe                    | yes              |
| IR94az          | DperIR94o      | DperIR94p      | <0.001   | 241    | 1995         | no                       | yes              |
|                 | DvirIR94w      | DvirIR94x      | 0.015    | 33     | 1995         | no                       | no, but same chr |
| IR51ab          | Dper/DpseIR51c | Dper/DpseIR51d | <0.001   | 79     | 2010         | likely                   | yes              |
| GR59ab          | DgriGR59bL2    | DgriGR59bL3    | <0.001   | 180    | 1188         | no                       | yes              |
|                 | DgriGR59bL1    | DgriGR59bL2    | <0.001   | 129    | 1188         | no                       | yes              |
|                 | DgriGR59bL1    | DgriGR59bL3    | <0.001   | 105    | 1188         | no                       | yes              |
|                 | DgriGR59bL3    | DgriGR59bL4    | <0.001   | 110    | 1188         | maybe                    | yes              |
|                 | DgriGR59bL2    | DgriGR59bL4    | <0.001   | 110    | 1188         | maybe                    | yes              |
|                 | DperGR59aL4    | DperGR59a      | <0.001   | 93     | 1188         | maybe                    | yes              |
|                 | DperGR59aL4    | DperGR59aL3    | <0.001   | 86     | 1188         | maybe                    | yes              |
|                 | DpseGR59aL3    | DpseGR59aL4    | <0.001   | 86     | 1188         | maybe                    | yes              |
| OR22a           | DanaOR22a3     | DanaOR22a4B    | <0.001   | 465    | 1206         | no                       | yes              |
|                 | DanaOR22a3     | DanaOR22a4A    | <0.001   | 465    | 1206         | no                       | yes              |
|                 | DanaOR22a4A    | DanaOR22a4B    | <0.001   | 1080   | 1206         | no                       | yes              |
|                 | DsimOR22a1     | DsimOR22a2     | 0.014    | 110    | 1206         | no                       | yes              |
| OR65bc          | DpseOR65b1     | DpseOR65b3     | <0.001   | 212    | 1290         | no                       | yes              |
|                 | DpseOR65b2     | DpseOR65b3     | <0.001   | 179    | 1290         | no                       | yes              |
|                 | DpseOR65b3     | DpseOR65b4     | 0.0057   | 98     | 1290         | no                       | yes              |
|                 | DyakOR65c1     | DyakOR65c2     | 0.0045   | 197    | 1290         | no                       | yes              |
|                 | DereOR65b      | DereOR65c      | 0.039    | 73     | 1290         | no                       | yes              |

<sup>a</sup>The other OGs analyzed and for which no convergence events were detected were: Gr92a93b, Gr36abc, Gr59ab, Gr59cd, Gr22a, Or22a, Or98a, Or65abc, Ir7eg, Ir51ab, Ir52b, Ir60b, Ir94a, and Obp18a. <sup>b</sup> Bonferroni correct  $p$  value. <sup>c</sup> Gene tree

Table S9. Results of the likelihood-based test for differences between gene birth and death rates.

| gene family | lnL L<br>( $\beta = \delta$ ) | lnL BD<br>( $\beta \neq \delta$ ) | LRT  | AIC L | AIC BD |
|-------------|-------------------------------|-----------------------------------|------|-------|--------|
| OBP         | -30.397                       | -30.256                           | 0.28 | 64.75 | 64.51  |
| OR          | -31.377                       | -31.335                           | 0.08 | 64.75 | 66.67  |
| GR          | -35.168                       | -34.729                           | 0.88 | 72.34 | 73.46  |
| IR          | -33.698                       | -33.661                           | 0.07 | 69.40 | 71.32  |

lnL L = log likelihood of model BadiRate L-GR-ML (1 parameter); lnL = loglikelihood of model of model BadiRate BD-GR-ML (2 parameters); LRT = likelihood ratio test results with df = 1 (The critical value for significance at  $\alpha = 0.05$  is 3.84); AIC = Akaike information criterion.

Table S10. Results of tests for differences in evolutionary constraints ( $\omega$ ) between duplication and speciation branches.

| OG       | lnL M0   | lnL BM2  | LRT   | <i>p</i> LRT        | adjusted $\alpha$ | $\omega_{\text{sel}}$ | $\omega_{\text{dup}}$ | $d_S$ |
|----------|----------|----------|-------|---------------------|-------------------|-----------------------|-----------------------|-------|
| OR42b    | -7803.9  | -7689.1  | 229.5 | 1.43E-50            | 0.0013            | 0.060                 | 0.559                 | <1    |
| OR59b    | -8145.8  | -8055.4  | 180.7 | 5.84E-40            | 0.0014            | 0.055                 | 0.371                 | <1.54 |
| GR93c    | -13059.1 | -13032.3 | 53.4  | 2.48E-12            | 0.0014            | 0.174                 | 0.412                 | <1.42 |
| GR47b    | -9971.3  | -9948.2  | 46.2  | 9.31E-11            | 0.0014            | 0.150                 | 0.650                 | <1.78 |
| OR49a    | -9664.6  | -9643.5  | 42.3  | 6.57E-10            | 0.0015            | 0.168                 | 0.496                 | <1.2  |
| OR22a    | -13577.4 | -13558.5 | 37.7  | 6.38E-09            | 0.0015            | 0.146                 | 0.257                 | <1.34 |
| OBP99b   | -2647.9  | -2629.4  | 37.0  | 9.46E-09            | 0.0016            | 0.086                 | 0.462                 | <1.48 |
| OR42a    | -9592.4  | -9574.4  | 36.1  | 1.42E-08            | 0.0016            | 0.088                 | 0.327                 | <1.08 |
| GR59ab   | -26321.7 | -26305.8 | 31.8  | 1.25E-07            | 0.0017            | 0.231                 | 0.371                 | <1.33 |
| OR33a    | -9805.5  | -9792.7  | 25.5  | 2.96E-06            | 0.0017            | 0.133                 | 0.287                 | <1.12 |
| OBP56g   | -3235.3  | -3223.6  | 23.2  | 9.13E-06            | 0.0018            | 0.175                 | 0.612                 | <2    |
| IR94e    | -13750.3 | -13739.4 | 21.7  | 1.93E-05            | 0.0019            | 0.134                 | 0.260                 | <1.12 |
| OR74a    | -8020.2  | -8009.6  | 21.1  | 2.59E-05            | 0.0019            | 0.096                 | 0.240                 | <1.2  |
| OR59a    | -4793.1  | -4784.4  | 17.4  | 0.0002              | 0.0020            | 0.069                 | 0.164                 | <1.23 |
| IR94f    | -13405.2 | -13397.1 | 16.2  | 0.0003              | 0.0021            | 0.214                 | 0.370                 | <1    |
| GR64cd   | -11569.7 | -11562.4 | 14.6  | 0.0007              | 0.0022            | 0.084                 | >1                    | <1.43 |
| OBP58b   | -3930.8  | -3924.0  | 13.7  | 0.0011              | 0.0023            | 0.087                 | 0.670                 | <1.7  |
| IR52     | -35368.3 | -35361.9 | 12.8  | 0.0017              | 0.0024            | 0.230                 | 0.289                 | <1.01 |
| IR75d    | -9984.0  | -9977.9  | 12.2  | 0.0023 <sup>a</sup> | 0.0025            | 0.077                 | 0.228                 | <1.02 |
| IR60     | -31071.5 | -31065.7 | 11.6  | 0.0030              | 0.0026            | 0.254                 | 0.324                 | <1.03 |
| IR68b    | -16026.7 | -16021.0 | 11.5  | 0.0032              | 0.0028            | 0.131                 | 0.202                 | <1.28 |
| OR85c    | -8170.1  | -8164.8  | 10.5  | 0.0053              | 0.0029            | 0.125                 | 0.416                 | <1    |
| OBP56a   | -2482.2  | -2478.5  | 7.3   | 0.0261              | 0.0031            | 0.122                 | 0.285                 | <1    |
| OBP56de  | -3520.1  | -3516.6  | 7.0   | 0.0304              | 0.0033            | 0.138                 | 1.286                 | <1.25 |
| GR98a    | -13305.1 | -13301.7 | 6.9   | 0.0317 <sup>b</sup> | 0.0036            | 0.208                 | 0.319                 | <1.21 |
| OR56a    | -1199.2  | -1196.3  | 5.8   | 0.0548              | 0.0038            | 0.103                 | 0.267                 | <1.35 |
| OR69a    | -445.5   | -444.0   | 2.9   | 0.2306              | 0.0042            | 0.061                 | 0.462                 | <1.22 |
| OR23a    | -9142.2  | -9140.8  | 2.9   | 0.2396              | 0.0045            | 0.150                 | 0.210                 | <1.7  |
| GR92a93d | -14213.0 | -14212.3 | 1.4   | 0.5016              | 0.0050            | 0.384                 | 0.331                 | <1.84 |
| OBP57de  | -3167.2  | -3166.5  | 1.3   | 0.5205              | 0.0056            | 0.278                 | 0.161                 | <1.32 |
| IR48ab   | -15951.8 | -15951.2 | 1.2   | 0.5498              | 0.0063            | 0.138                 | 0.198                 | <1.58 |
| OR82a    | -4261.2  | -4260.7  | 1.1   | 0.5867              | 0.0071            | 0.110                 | 0.138                 | <1.35 |
| OBP56c   | -4986.0  | -4985.5  | 0.9   | 0.6372              | 0.0083            | 0.216                 | 0.266                 | <1.3  |
| OR85f    | -109.5   | -109.2   | 0.8   | 0.6706              | 0.0100            | 0.166                 | 0.042                 | <1.31 |
| GR36abc  | -12667.7 | -12667.4 | 0.6   | 0.7438              | 0.0125            | 0.298                 | 0.272                 | <1.06 |
| GR98bcd  | -16522.9 | -16522.8 | 0.3   | 0.8663              | 0.0167            | 0.240                 | 0.256                 | <1.23 |
| OR67a    | -14670.8 | -14670.7 | 0.2   | 0.8909              | 0.0250            | 0.198                 | 0.188                 | <1.28 |
| GR59cd   | -31916.0 | -31915.9 | 0.2   | 0.9048              | 0.0500            | 0.245                 | 0.253                 | <1.95 |

<sup>a</sup> Comparisons above the first line are significant after sequential Bonferroni correction.<sup>b</sup> Comparisons above the second line are significant with  $\alpha = 0.0$
